# Supplementary material for: COVID-19 collateral damage—psychological burden and behavioural changes among older adults during the first outbreak in Stockholm, Sweden: a cross-sectional study
Source: PubMed Central journal article supplement (PMC8743841; doi:10.1136/bmjopen-2021-058422), 2022-01-07
Supplement: bmjopen-2021-058422.draft_revisions.pdf [file bmjopen-2021-058422.draft_revisions.pdf]

# BMJ Open

BMJ Open is committed to open peer review. As part of this commitment we make the peer review history of every article we publish publicly available.

When an article is published we post the peer reviewers' comments and the authors' responses online. We also post the versions of the paper that were used during peer review. These are the versions that the peer review comments apply to.

The versions of the paper that follow are the versions that were submitted during the peer review process. They are not the versions of record or the final published versions. They should not be cited or distributed as the published version of this manuscript.

BMJ Open is an open access journal and the full, final, typeset and author-corrected version of record of the manuscript is available on our site with no access controls, subscription charges or pay-per-view fees (<http://bmjopen.bmj.com>).

If you have any questions on BMJ Open's open peer review process please email [info.bmjopen@bmj.com](mailto:info.bmjopen@bmj.com)

# BMJ Open

## COVID-19 collateral damage: psychological burden and behavioral changes among older adults during the first outbreak in Stockholm, Sweden

|                               |                                                                                                                                                                                                                                                                                                                                                                                                                                                                                                                                                                                                                                                                     |
|-------------------------------|---------------------------------------------------------------------------------------------------------------------------------------------------------------------------------------------------------------------------------------------------------------------------------------------------------------------------------------------------------------------------------------------------------------------------------------------------------------------------------------------------------------------------------------------------------------------------------------------------------------------------------------------------------------------|
| Journal:                      | <i>BMJ Open</i>                                                                                                                                                                                                                                                                                                                                                                                                                                                                                                                                                                                                                                                     |
| Manuscript ID                 | bmjopen-2021-058422                                                                                                                                                                                                                                                                                                                                                                                                                                                                                                                                                                                                                                                 |
| Article Type:                 | Original research                                                                                                                                                                                                                                                                                                                                                                                                                                                                                                                                                                                                                                                   |
| Date Submitted by the Author: | 15-Oct-2021                                                                                                                                                                                                                                                                                                                                                                                                                                                                                                                                                                                                                                                         |
| Complete List of Authors:     | Beridze, Giorgi; Karolinska Institute, Aging Research Center, Department of Neurobiology, Care Sciences and Society<br>Triolo, Federico; Karolinska Institute, Aging Research Center, Department of Neurobiology, Care Sciences and Society<br>Grande, Giulia; Karolinska Institute, Aging Research Center, Department of Neurobiology, Care Sciences and Society<br>Fratiglioni, Laura; Karolinska Institute, Aging Research Center, Department of Neurobiology, Care Sciences and Society; Stockholm Gerontology Research Center<br>Calderón-Larrañaga, Amaia; Karolinska Institute, Aging Research Center, Department of Neurobiology, Care Sciences and Society |
| Keywords:                     | COVID-19, EPIDEMIOLOGY, GERIATRIC MEDICINE                                                                                                                                                                                                                                                                                                                                                                                                                                                                                                                                                                                                                          |
|                               |                                                                                                                                                                                                                                                                                                                                                                                                                                                                                                                                                                                                                                                                     |

SCHOLARONE™  
Manuscripts

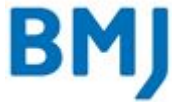

I, the Submitting Author has the right to grant and does grant on behalf of all authors of the Work (as defined in the below author licence), an exclusive licence and/or a non-exclusive licence for contributions from authors who are: i) UK Crown employees; ii) where BMJ has agreed a CC-BY licence shall apply, and/or iii) in accordance with the terms applicable for US Federal Government officers or employees acting as part of their official duties; on a worldwide, perpetual, irrevocable, royalty-free basis to BMJ Publishing Group Ltd ("BMJ") its licensees and where the relevant Journal is co-owned by BMJ to the co-owners of the Journal, to publish the Work in this journal and any other BMJ products and to exploit all rights, as set out in our [licence](#).

The Submitting Author accepts and understands that any supply made under these terms is made by BMJ to the Submitting Author unless you are acting as an employee on behalf of your employer or a postgraduate student of an affiliated institution which is paying any applicable article publishing charge ("APC") for Open Access articles. Where the Submitting Author wishes to make the Work available on an Open Access basis (and intends to pay the relevant APC), the terms of reuse of such Open Access shall be governed by a Creative Commons licence – details of these licences and which [Creative Commons](#) licence will apply to this Work are set out in our licence referred to above.

Other than as permitted in any relevant BMJ Author's Self Archiving Policies, I confirm this Work has not been accepted for publication elsewhere, is not being considered for publication elsewhere and does not duplicate material already published. I confirm all authors consent to publication of this Work and authorise the granting of this licence.

**TITLE**

COVID-19 collateral damage: psychological burden and behavioral changes among older adults during the first outbreak in Stockholm, Sweden

**AUTHORS**

Giorgi Beridze<sup>1</sup>, Federico Triolo<sup>1</sup>, Giulia Grande<sup>1</sup>, Laura Fratiglioni<sup>1,2</sup>, Amaia Calderón-Larrañaga<sup>1</sup>

**AFFILIATIONS**

1. Aging Research Center, Department of Neurobiology, Care Sciences and Society, Karolinska Institutet-Stockholm University, 17165 Solna, Sweden
2. Stockholm Gerontology Research Center, Stiftelsen Stockholms läns Äldrecentrum, 113 46 Stockholm, Sweden

**CORRESPONDING AUTHOR**

Giorgi Beridze, MD, MMSc

Tomtebodavägen 18a, Solna, Sweden 17165

giorgi.beridze@ki.se

**KEYWORDS**

COVID-19; collateral damage; restrictions; older adults

**WORD COUNT:** 2749

## ABSTRACT

**Introduction:** During the first wave of the COVID-19 pandemic, Swedish public health authorities provided recommendations for 70+ year old people. They were strongly encouraged to self-isolate but remain physically active in a safe manner. This study aimed to explore the indirect, negative effects of COVID-19 restrictions (collateral damage) on the lives and health of older adults living in central Stockholm, and to characterize the sociodemographic profile of those with the highest susceptibility to this damage.

**Methods:** An *ad-hoc* phone questionnaire was administered by trained staff between May and June 2020 to a random sample of older adults 68+ years old (n=1231), who had attended the regular follow-up assessment of the Swedish National study on Aging and Care in Kungsholmen (SNAC-K) during 2016-2019. We explored three dimensions of collateral damage: psychological burden (feelings of worry, stress and loneliness), reductions in social and physical activities, and reductions in medical and social care use since the beginning of the pandemic. Logistic regression models were used to test the association between age, sex, education and living arrangement, and the risk of collateral damage.

**Results:** Vast majority of participants adhered to the recommendations, with over three quarters practicing self-isolation (n=928). Half of the sample reported psychological burden, 55.3% reported reductions in social or physical activity, and 11.3% reported decreased medical or social care use. 77.8% were affected by at least one of the three collateral damage dimensions. Female sex was the strongest sociodemographic predictor of both individual and co-occurring dimensions of collateral damage.

**Conclusion:** COVID-19 and its restrictions during the first half of 2020 had a negative effect on the health and lives of a majority of elderly living in central Stockholm. Women were at a

1  
2  
3 higher risk of these negative consequences. We emphasize the need for predefined, evidence-  
4 based interventions to address these negative consequences.  
5  
6  
7

## 8 **STRENGTHS AND LIMITATIONS OF THIS STUDY**

9

- 10  
11
- 12 • This study uses a large sample of older adults from a well-characterized population-  
13 based study (SNAC-K)
  - 14 • Several dimensions of the indirect, negative effects (collateral damage) of the COVID-  
15 19 pandemic are explored in this study
  - 16 • As Sweden's response to COVID-19 differed from most countries, this study provides  
17 a unique opportunity of comparison with other settings
  - 18 • The cross-sectional design of this study does not allow to establish temporality between  
19 the onset of the pandemic and studied outcomes
  - 20 • The results of this study may not be generalizable to the entire elderly population in  
21 Sweden as participants are from an urban, affluent area in Stockholm
- 22  
23  
24  
25  
26  
27  
28  
29  
30  
31  
32  
33  
34  
35  
36  
37  
38  
39  
40  
41  
42  
43  
44  
45  
46  
47  
48  
49  
50  
51  
52  
53  
54  
55  
56  
57  
58  
59  
60

## INTRODUCTION

The outbreak caused by the novel coronavirus, SARS-CoV2, was declared a global pandemic by the World Health Organization (WHO) on March 11<sup>th</sup> 2020, coinciding with the date of the first confirmed death in Sweden. Early on, it was identified that older adults were at a significantly higher risk of mortality from COVID-19. Indeed, as of January 18<sup>th</sup> 2021, 91% of deaths attributed to COVID-19 in Sweden have happened in those aged 70 and above [1]. Later on, additional prognostic factors were identified, including male sex, socioeconomic disadvantage, the presence of comorbidities and frailty [2–5].

In response to the pandemic, most countries have implemented strict measures to help curb the spread of the virus and reduce mortality. Sweden's response to COVID-19 differed from most countries by not implementing strict lockdowns and restrictions, but instead relying on high voluntary adherence to the recommendations proposed by the Public Health Agency. The general recommendations included keeping good hand hygiene, practicing social distancing and avoiding contact if having any symptoms [6]. On top of these, the specific recommendations for the elderly were to stay at home, avoid social gatherings and public transportation, but to remain physically active outdoors in a safe manner [6].

The importance of looking beyond mortality and morbidity when assessing national response strategies for COVID-19 has been raised [7]. Stay-at-home orders and lack of contact with loved ones put elderly at risk of loneliness and social isolation, which, in turn, are known to have negative effects, particularly in old age [8]. Reduced physical activity and sedentarism have detrimental effects on physical and mental health [9,10]. Additionally, due to the overburdening of healthcare services and reduced access to medical, social and informal care, new conditions may not be timely diagnosed, and existing health conditions may be exacerbated. These consequences can be considered indirect, negative effects (i.e. collateral damage) of COVID-19 restrictions.

1  
2  
3 While several studies have examined the distribution of COVID-19 mortality among Swedish  
4 older adults by sex, socioeconomic and household factors [11–13], little is known on the  
5 collateral damage of these restrictions. To the best of our knowledge, only one study has  
6 examined the mental health consequences of the Swedish strategy on the elderly [14], and no  
7 study has looked into other dimensions such as psychological wellbeing and/or behavioral  
8 changes. Thus, the aims of this study were to explore different dimensions of the collateral  
9 damage linked to COVID-19 during the first epidemic outbreak in an older population of central  
10 Stockholm, as well as to characterize the sociodemographic profile of those with the highest  
11 susceptibility to this damage.  
12  
13  
14  
15  
16  
17  
18  
19  
20  
21  
22  
23  
24  
25  
26

## 27 **METHODS**

### 28 **Study population**

29  
30 Study population consisted of 1231 older adults aged between 68 and 103, participating in the  
31 Swedish National study on Aging and Care in Kungsholmen (SNAC-K). SNAC-K is a  
32 longitudinal study including a random sample of older adults aged 60 years and above living in  
33 the Kungsholmen area of Stockholm, Sweden. All SNAC-K participants who had participated  
34 in the regular follow-up assessment during 2016-2019 were invited to participate in a telephone  
35 interview aimed at monitoring preventive behaviors and the direct and indirect health  
36 consequences of the COVID-19 pandemic. Telephone interviews were conducted between May  
37 and June 2020 (95%) by trained SNAC-K staff, following a multi-choice questionnaire that was  
38 *ad hoc* developed by the SNAC-K data collection team as well as experts in geriatric medicine,  
39 neurology and public health. The questionnaire comprised a selection of items from the original  
40 SNAC-K assessments and from the WHO Europe survey tool to monitor the public's risk  
41 perceptions, behaviors, trust and knowledge concerning the pandemic outbreak response [15].  
42  
43  
44  
45  
46  
47  
48  
49  
50  
51  
52  
53  
54  
55  
56  
57  
58  
59  
60 The interview was preceded by a brief explanation whereby participants were told that all



1  
2  
3 questions referred specifically to the pandemic context. Exclusion criteria included living in  
4 care and nursing homes, known diagnosis of dementia and very impaired hearing. The response  
5 rate was 91.9%. Subjects who refused to participate or could not be contacted had similar age  
6 and educational attainment to those who participated, but were more likely to be male (45.4%  
7 vs 35.7%,  $p=0.044$ ).

### 15 **Collateral damage**

17  
18 In this study we examined three dimensions of collateral damage: psychological burden and  
19 two aspects related to behavioral changes, i.e. reductions in social and physical activities, and  
20 in medical and social care use. All questions explicitly asked participants about changes since  
21 the beginning of the pandemic. Psychological burden was assessed with variables related to  
22 worrying about being affected by COVID-19 (very/extremely vs. not at  
23 all/somewhat/moderately), worrying about loved ones being affected by COVID-19  
24 (very/extremely vs. not at all/somewhat/moderately), feeling nervous and/or stressed  
25 (often/very often vs. never/sometimes), and loneliness ( $\geq 5$  vs.  $< 5$  on the Three-Item Loneliness  
26 Scale [16]). The three questions on COVID19-related feelings of worry, nervousness or stress  
27 were taken directly from the first version of the WHO Europe survey tool mentioned above.  
28  
29 The Three-Item Loneliness Scale is a short version of the R-UCLA Loneliness Scale that is part  
30 of several European aging cohorts such as the Survey of Health, Ageing and Retirement in  
31 Europe (SHARE) or the English Longitudinal Study of Ageing (ELSA). It measures indirect  
32 loneliness based on the items “companionship”, “left out”, and “isolated”, which are answered  
33 on a three point Likert scale (“often”, “some of the time”, “hardly ever or never”). The minimum  
34 of the resulting score is 3 (“not lonely”) and the maximum is 9 (“very lonely”). Changes in  
35 social and physical activities were measured by asking participants about reductions in social  
36 interactions, reductions in light physical activity (yes/no) and reductions in vigorous physical  
37 activity (yes/no). A reduction in social interactions, hereon referred to as social isolation, was  
38  
39  
40  
41  
42  
43  
44  
45  
46  
47  
48  
49  
50  
51  
52  
53  
54  
55  
56  
57  
58  
59  
60

1  
2  
3 defined as a reduction in physical communication with family and friends without an increase  
4  
5 in phone and/or video communication. Care-related items included refraining from seeking  
6  
7 medical care (yes/no) and receiving reduced care at home. Reduced care at home was defined  
8  
9 as a decrease in the use of formal home-care services without an increase in received informal  
10  
11 care.  
12  
13

### 14 15 **Preventive measures and sources of information**

16  
17  
18 Participants were asked about their adherence to a list of 9 recommendations –both general and  
19  
20 those specific to elderly–, and the most common sources of information regarding the COVID-  
21  
22 19 pandemic.  
23  
24

### 25 26 **Sociodemographics**

27  
28 Sociodemographic variables in the present study included age, sex, education and living  
29  
30 arrangement. Age was dichotomized as youngest old ( $\leq 80$  years old) and oldest old ( $> 80$  years  
31  
32 old). Highest obtained education was dichotomized as low (elementary) and high (high school,  
33  
34 university, or above). Living arrangement was dichotomized into those who lived alone and  
35  
36 those who did not.  
37  
38

### 39 40 41 **Statistical analysis**

42  
43  
44 Characteristics of the study sample were reported as overall, as well as stratified by the four  
45  
46 sociodemographic variables. Between-group differences were assessed via two-tailed t-tests  
47  
48 and chi-square tests as appropriate. Binary logistic regression models were used to assess the  
49  
50 associations between sociodemographic variables and the different collateral damage  
51  
52 dimensions, as well as each item within these dimensions. All models were mutually adjusted  
53  
54 for all sociodemographic variables. All statistical tests were performed in StataSE 15  
55  
56 (StataCorp LLC, College Station, TX, USA). Significance level (alpha) was set at 0.05 for all  
57  
58 analyses.  
59  
60

## Ethical considerations

Informed consent was obtained from all participants. The study was approved by the Regional Ethics Review Board in Stockholm (dnr: 2020-02497).

## Patient and public involvement

There was no direct public involvement either in the setting of the research questions or developing the study design.

## RESULTS

The mean age of participants was 78.2 years, 64.3% were female, 34.3% had elementary educational attainment and 50.2% lived alone (**Table 1**). Five percent of participants (n=62) reported being tested for COVID-19, 9 of which reported testing positive. Almost half of the sample (48.3%, n=595) sought medical care during the period March-June 2020, with 79 of them finding it more difficult to access it. Nine participants reported being hospitalized for suspected or confirmed COVID-19.

The most commonly reported preventive behaviors were physical distancing of at least two meters (98.0%) and washing hands for at least 20 seconds (98.0%), followed by covering mouth and nose when coughing or sneezing (88.5%) and staying home in case of illness or cold (88.4%) (**Figure 1**). Three quarters of the sample (76.8%) reported self-isolating. The least commonly reported measure was usage of face masks (15.2%). Most participants stayed up to date on the COVID-19 pandemic using television (95.9%); over three quarters (77.6%) reported following the Public Health Agency's press-conferences. Digital sources, such as social media and online news websites were the least reported sources (22.9% and 59.8% respectively).

1  
2  
3 Half of the sample experienced certain level of psychological burden, with the most common  
4 items being loneliness (33.4%) and worrying about loved ones getting COVID-19 (24.9%)  
5  
6  
7 **(Table 2)**. More than half (55.3%) experienced a reduction in either social or physical activities,  
8  
9 and 11.3% either refrained from seeking medical care or received less social care at home. In  
10  
11 total, 77.8% of participants (n=956) experienced at least one of the three dimensions of  
12  
13 collateral damage comprising psychological burden, reductions in social and physical activities,  
14  
15 and decreased medical and social care use. Almost half (43.7%) reported experiencing one  
16  
17 dimension of collateral damage, while the remainder (34.1%) experienced two or more.  
18  
19 Univariate associations between each of the four sociodemographic variables and the different  
20  
21 collateral damage dimensions are presented in **Supplementary Tables 1 and 2**.  
22  
23  
24  
25

26  
27 Women had higher odds of experiencing all items within the dimensions of psychological  
28  
29 burden and social and physical activity reduction **(Table 3)**. Within the dimension of  
30  
31 psychological burden, the oldest old had significantly lower odds of worrying about getting  
32  
33 COVID-19. Those who lived alone had significantly lower odds of worrying about loved ones  
34  
35 getting COVID-19, but higher odds of loneliness. Within the dimension of social and physical  
36  
37 activity reductions, the oldest old had significantly higher odds of reducing light physical  
38  
39 activity, while the oldest old and those who lived alone had lower odds of decreasing vigorous  
40  
41 activity. Within the dimension of medical and social care use reduction, those with lower  
42  
43 education had higher odds of receiving less care at home.  
44  
45  
46  
47

48  
49 Women were more likely to experience one (OR: 1.38, 95% CI: 1.01;1.90), two (OR: 2.36,  
50  
51 95% CI: 1.66;3.35) and all three (OR: 2.21, 95% CI: 1.08;4.55) collateral damage dimensions  
52  
53 compared to men **(Figure 2)**. No statistically significant differences were detected for age,  
54  
55 education and living arrangement in terms of the number of experienced dimensions of  
56  
57 collateral damage, after adjusting for the rest of sociodemographic factors.  
58  
59  
60

## DISCUSSION

In this study examining the collateral damage of COVID-19 restrictions in terms of psychological burden, reductions in social and physical activities, and decreased medical and social care use in a Swedish urban older population, we found that over three quarters of the sample was affected by at least one dimension, with women being at a considerably higher risk. We also showed that the vast majority of the study population adhered to the COVID-19 preventive measures during the first half of 2020.

### Interpretation of results

Adherence to national recommendations is an important factor in mitigating the negative effects of the COVID-19 pandemic. We found that participants in our study were well-informed about the pandemic and adopted low-risk behaviors during the first wave of COVID-19 outbreak. The majority of participants followed the Public Health Agency press-conferences, likely reflecting the high social and institutional trust in Sweden [14], and adhered to the Agency's strongly recommended preventive measures.

We observe a substantial impact of the pandemic on the mental health of the elderly, with half of the sample reporting psychological burden. A fair share of the sample reported worrying about themselves and their loved ones being affected by COVID-19. Interestingly, the latter seems to be of more concern, a finding that has been replicated in another Swedish survey [14]. Loneliness and feelings of stress were also prevalent in our sample. This is in line with a large body of research showing considerable effects of the pandemic on mental health outcomes [17,18]. The burden seems to be unevenly borne by women and, to a lesser extent, by those living alone. Indeed, previous research has shown that women are at a higher risk of poor mental health [18] and worrying about family [19] during the pandemic.

1  
2  
3 High adherence to self-isolation recommendations, combined with a decrease in physical  
4 contact with loved ones, puts older adults at risk of social isolation. Social isolation presents a  
5 major modern-day challenge and has been associated with several negative health outcomes,  
6 such as depression [20], frailty [21], cognitive decline [22] and low quality of life [23,24].  
7  
8 While we did observe a reduction in frequency of physical meetings with family, friends and  
9 neighbors, this was largely met with an increase in phone and video communication with them.  
10  
11 This is very important in the context of preventing the negative effects of loneliness and social  
12 isolation, as alternate forms of communication may buffer such effects [25,26].  
13  
14  
15  
16  
17  
18  
19  
20  
21

22 Concern has been raised about reduction in physical activity as a major collateral consequence  
23 of the pandemic restrictions, as low physical activity is linked to negative cardiovascular and  
24 metabolic outcomes [9], poor mental health [10], frailty [27], and insomnia [28], among others.  
25  
26 In spite of the Public Health Agency's recommendations for the elderly to remain physically  
27 active and spend time outdoors in a safe manner, we still found that up to a third of the sample  
28 had decreased their frequency of both light and vigorous physical activity. Furthermore, it is  
29 important to highlight that the reduction in light physical activity was more prominent among  
30 the oldest old, who, in all likelihood, were also doing less incidental physical activity, such as  
31 climbing the stairs or visiting the supermarket, due to self-isolation. They might encounter  
32 difficulties in returning to their former activity levels should the pandemic persist for a long  
33 time, which requires close monitoring from medical and social services.  
34  
35  
36  
37  
38  
39  
40  
41  
42  
43  
44  
45  
46  
47

48 We found that subjects in our sample limited their contact with the healthcare system during  
49 the first wave of the pandemic, but when seeking for help, received it in a timely and satisfactory  
50 way. This is an important finding in a context where hospital overcrowding has emerged as an  
51 important challenge in many countries. Around 10% of our sample refrained from seeking  
52 medical care altogether, which may explain, among others, the reduction in cancer diagnosis  
53 by Swedish healthcare services compared to previous years [29]. Still, the proportion of those  
54  
55  
56  
57  
58  
59  
60

1  
2  
3 refraining was significantly lower than in the US, where a third of the population aged 65+  
4  
5 reported delaying or avoiding medical care during the first wave of the pandemic [30]. Subjects  
6  
7 also decreased their use of formal care but seem to have compensated for it by an increase in  
8  
9 received informal care. This could become a concern should the pandemic persist, since it is  
10  
11 widely acknowledged that informal caregiving places significant economic, physical and  
12  
13 mental burden on caregivers, who are often themselves older adults with health needs [31].  
14  
15

### 16 17 **Strengths and limitations**

18  
19  
20 To the best of our knowledge, this study is the first to examine the consequences of the Swedish  
21  
22 COVID-19 strategy in a random sample of urban older adults. Further strengths include the use  
23  
24 of an *ad hoc* questionnaire developed by a multidisciplinary team of experts, and the study  
25  
26 sample coming from a well-characterized population-based study. Being based on data from  
27  
28 Sweden, the study also provides a unique opportunity for comparison with other settings, as the  
29  
30 Swedish strategy against COVID-19 differed from most countries. Certain limitations also need  
31  
32 to be highlighted. We did not have recent pre-pandemic measures of physical and mental health.  
33  
34 Thus, despite participants being asked to answer the questions for the period since March, the  
35  
36 cross-sectional design does not allow us to assess temporal relationship between the onset of  
37  
38 the pandemic and the studied outcomes. The findings from this cohort of older adults living in  
39  
40 an affluent neighborhood of Stockholm may not be generalizable to the entire Swedish  
41  
42 population. However, these findings could be viewed as a best-case scenario, and the identified  
43  
44 collateral damage would be expected to be of higher magnitude in less urban and affluent parts  
45  
46 of the country.  
47  
48  
49  
50  
51

### 52 53 **Conclusion**

54  
55  
56 The results from this study indicate that, in addition to morbidity and mortality, COVID-19 and  
57  
58 its related restrictions during the first half of 2020 have also resulted in changes that negatively  
59  
60

1  
2  
3 affect the health and lives of the elderly living in Central Stockholm. Furthermore, we found  
4  
5 age-, sex-, living arrangement- and, to a much lesser extent, education-related differences in the  
6  
7 susceptibility to these consequences, with women being at a particularly increased risk. When  
8  
9 introducing restrictions, we emphasize the need of a predefined, evidence-based strategy to  
10  
11 provide support, both during the pandemic and once the outbreak is overcome, to those who are  
12  
13 most susceptible to these consequences.  
14  
15  
16  
17  
18  
19  
20  
21  
22  
23  
24  
25  
26  
27  
28  
29  
30  
31  
32  
33  
34  
35  
36  
37  
38  
39  
40  
41  
42  
43  
44  
45  
46  
47  
48  
49  
50  
51  
52  
53  
54  
55  
56  
57  
58  
59  
60

For peer review only



1  
2  
3 **Contributors:** GB, LF, and AC-L developed the study concept and design. GB performed the  
4 data analysis and drafted the manuscript. All authors interpreted the data, provided critical  
5 revisions and approved the final version of the manuscript for submission.  
6  
7  
8  
9

10  
11  
12 **Funding:** This work was supported by the funders of the Swedish National study on Aging and  
13 Care (SNAC): the Ministry of Health and Social Affairs, Sweden; the participating county  
14 councils and municipalities; and the Swedish Research Council. A specific grant was obtained  
15 from the Swedish Research Council (2020-05931). Funders had no role in the in the study  
16 design; in the collection, analysis and interpretation of the data; in the writing of the report; and  
17 in the decision to submit the paper for publication.  
18  
19  
20  
21  
22  
23  
24  
25

26  
27  
28 **Competing interests:** None declared.  
29  
30

31  
32  
33 **Patient consent for publication:** Not required.  
34  
35

36  
37  
38 **Provenance and peer review:** Not commissioned; externally peer reviewed.  
39  
40

41  
42 **Data availability statement:** Data are from the SNAC-K project, a population-based study on  
43 aging and dementia (<http://www.snac-k.se/>). Access to these original data is available to the  
44 research community upon approval by the SNAC-K data management and maintenance  
45 committee. Applications for accessing these data can be submitted to Maria Wahlberg  
46 (Maria.Wahlberg@ki.se) at the Aging Research Center, Karolinska Institutet.  
47  
48  
49  
50  
51  
52  
53  
54  
55  
56  
57  
58  
59  
60

## REFERENCES

- 1 Public Health Agency of Sweden. COVID-19 statistics in Sweden. <https://www.folkhalsomyndigheten.se/smittykydd-beredskap/utbrott/aktuella-utbrott/covid-19/statistik-och-analyser/bekraftade-fall-i-sverige/> (accessed 24 Jan 2021).
- 2 Parohan M, Yaghoubi S, Seraji A, *et al.* Risk factors for mortality in patients with Coronavirus disease 2019 (COVID-19) infection: a systematic review and meta-analysis of observational studies. *The Aging Male* 2020;:1–9. doi:10.1080/13685538.2020.1774748
- 3 Tehrani S, Killander A, Åstrand P, *et al.* Risk factors for death in adult COVID-19 patients: Frailty predicts fatal outcome in older patients. *International Journal of Infectious Diseases* 2021;102:415–21. doi:10.1016/j.ijid.2020.10.071
- 4 Hawkins RB, Charles EJ, Mehaffey JH. Socio-economic status and COVID-19–related cases and fatalities. *Public Health* 2020;189:129–34. doi:10.1016/j.puhe.2020.09.016
- 5 Marengoni A, Zucchelli A, Vetrano DL, *et al.* Beyond Chronological Age: Frailty and Multimorbidity Predict In-Hospital Mortality in Patients With Coronavirus Disease 2019. *The Journals of Gerontology: Series A* 2020;:glaa291. doi:10.1093/gerona/glaa291
- 6 Protect yourself and others. [https://www.folkhalsomyndigheten.se/globalassets/smittykydd-sjukdomar/sjukdomar/coronavirus/faktablad-pa-olika-sprak/trafikljus\\_engelska\\_what-to-do-if-you-are.pdf](https://www.folkhalsomyndigheten.se/globalassets/smittykydd-sjukdomar/sjukdomar/coronavirus/faktablad-pa-olika-sprak/trafikljus_engelska_what-to-do-if-you-are.pdf) (accessed 25 Jan 2021).
- 7 Calderón-Larrañaga A, Dekhtyar S, Vetrano DL, *et al.* COVID-19: risk accumulation among biologically and socially vulnerable older populations. *Ageing Research Reviews* 2020;63:101149. doi:10.1016/j.arr.2020.101149
- 8 Courtin E, Knapp M. Social isolation, loneliness and health in old age: a scoping review. *Health Soc Care Community* 2017;25:799–812. doi:10.1111/hsc.12311
- 9 Narici M, De Vito G, Franchi M, *et al.* Impact of sedentarism due to the COVID-19 home confinement on neuromuscular, cardiovascular and metabolic health: Physiological and pathophysiological implications and recommendations for physical and nutritional countermeasures. *European Journal of Sport Science* 2020;:1–22. doi:10.1080/17461391.2020.1761076
- 10 Callow DD, Arnold-Nedimala NA, Jordan LS, *et al.* The Mental Health Benefits of Physical Activity in Older Adults Survive the COVID-19 Pandemic. *The American Journal of Geriatric Psychiatry* 2020;28:1046–57. doi:10.1016/j.jagp.2020.06.024
- 11 Brandén M, Aradhya S, Kolk M, *et al.* Residential context and COVID-19 mortality among adults aged 70 years and older in Stockholm: a population-based, observational study using individual-level data. *The Lancet Healthy Longevity* 2020;1:e80–8. doi:10.1016/S2666-7568(20)30016-7
- 12 Calderón-Larrañaga A, Vetrano DL, Rizzuto D, *et al.* High excess mortality in areas with young and socially vulnerable populations during the COVID-19 outbreak in Stockholm Region, Sweden. *BMJ Glob Health* 2020;5:e003595. doi:10.1136/bmjgh-2020-003595

- 1  
2  
3 13 Drefahl S, Wallace M, Mussino E, *et al.* A population-based cohort study of socio-  
4 demographic risk factors for COVID-19 deaths in Sweden. *Nat Commun* 2020;**11**:5097.  
5 doi:10.1038/s41467-020-18926-3  
6  
7  
8 14 Gustavsson J, Beckman L. Compliance to Recommendations and Mental Health  
9 Consequences among Elderly in Sweden during the Initial Phase of the COVID-19  
10 Pandemic—A Cross Sectional Online Survey. *IJERPH* 2020;**17**:5380.  
11 doi:10.3390/ijerph17155380  
12  
13 15 World Health Organization. Regional Office for Europe. Survey tool and guidance: rapid,  
14 simple, flexible behavioural insights on COVID-19: 29 July 2020. Copenhagen: 2020.  
15 <https://apps.who.int/iris/handle/10665/333549>  
16  
17 16 Hughes ME, Waite LJ, Hawkey LC, *et al.* A Short Scale for Measuring Loneliness in  
18 Large Surveys: Results From Two Population-Based Studies. *Res Aging* 2004;**26**:655–72.  
19 doi:10.1177/0164027504268574  
20  
21 17 Xiong J, Lipsitz O, Nasri F, *et al.* Impact of COVID-19 pandemic on mental health in the  
22 general population: A systematic review. *Journal of Affective Disorders* 2020;**277**:55–64.  
23 doi:10.1016/j.jad.2020.08.001  
24  
25 18 Vindegaard N, Benros ME. COVID-19 pandemic and mental health consequences:  
26 Systematic review of the current evidence. *Brain, Behavior, and Immunity* 2020;**89**:531–  
27 42. doi:10.1016/j.bbi.2020.05.048  
28  
29 19 van der Vegt I, Kleinberg B. Women Worry About Family, Men About the Economy:  
30 Gender Differences in Emotional Responses to COVID-19. In: Aref S, Bontcheva K,  
31 Braghieri M, *et al.*, eds. *Social Informatics*. Cham: : Springer International Publishing  
32 2020. 397–409. doi:10.1007/978-3-030-60975-7\_29  
33  
34 20 Schwarzbach M, Lupp M, Forstmeier S, *et al.* Social relations and depression in late life-  
35 A systematic review: Social relations and depression in late life. *Int J Geriatr Psychiatry*  
36 2014;**29**:1–21. doi:10.1002/gps.3971  
37  
38 21 Jarach CM, Tettamanti M, Nobili A, *et al.* Social isolation and loneliness as related to  
39 progression and reversion of frailty in the Survey of Health Aging Retirement in Europe  
40 (SHARE). *Age and Ageing* 2020;:afaa168. doi:10.1093/ageing/afaa168  
41  
42 22 Evans IEM, Martyr A, Collins R, *et al.* Social Isolation and Cognitive Function in Later  
43 Life: A Systematic Review and Meta-Analysis. *JAD* 2019;**70**:S119–44. doi:10.3233/JAD-  
44 180501  
45  
46 23 Beridze G, Ayala A, Ribeiro O, *et al.* Are Loneliness and Social Isolation Associated with  
47 Quality of Life in Older Adults? Insights from Northern and Southern Europe. *IJERPH*  
48 2020;**17**:8637. doi:10.3390/ijerph17228637  
49  
50 24 Luna E, Ruiz M, Malyutina S, *et al.* The prospective association between frequency of  
51 contact with friends and relatives and quality of life in older adults from Central and  
52 Eastern Europe. *Soc Psychiatry Psychiatr Epidemiol* Published Online First: 10 February  
53 2020. doi:10.1007/s00127-020-01834-8  
54  
55  
56  
57  
58  
59  
60

- 1  
2  
3 25 Hajek A, König H-H. Social Isolation and Loneliness of Older Adults in Times of the  
4 COVID-19 Pandemic: Can Use of Online Social Media Sites and Video Chats Assist in  
5 Mitigating Social Isolation and Loneliness? *Gerontology* 2021;**67**:121–4.  
6 doi:10.1159/000512793  
7
- 8  
9 26 Kahlon MK, Aksan N, Aubrey R, *et al.* Effect of Layperson-Delivered, Empathy-Focused  
10 Program of Telephone Calls on Loneliness, Depression, and Anxiety Among Adults  
11 During the COVID-19 Pandemic: A Randomized Clinical Trial. *JAMA Psychiatry*  
12 Published Online First: 23 February 2021. doi:10.1001/jamapsychiatry.2021.0113  
13
- 14 27 da Silva VD, Tribess S, Meneguci J, *et al.* Association between frailty and the  
15 combination of physical activity level and sedentary behavior in older adults. *BMC Public*  
16 *Health* 2019;**19**:709. doi:10.1186/s12889-019-7062-0  
17
- 18 28 Inoue S, Yorifuji T, Sugiyama M, *et al.* Does Habitual Physical Activity Prevent  
19 Insomnia? A Cross-Sectional and Longitudinal Study of Elderly Japanese. *Journal of*  
20 *Aging and Physical Activity* 2013;**21**:119–39. doi:10.1123/japa.21.2.119  
21
- 22 29 Konsekvenser för personer 70 år och äldre av smittskyddsåtgärder mot covid19.  
23 Folkhälsomyndigheten 2021.  
24
- 25 30 Czeisler MÉ, Marynak K, Clarke KEN, *et al.* Delay or Avoidance of Medical Care  
26 Because of COVID-19–Related Concerns — United States, June 2020. *MMWR Morb*  
27 *Mortal Wkly Rep* 2020;**69**:1250–7. doi:10.15585/mmwr.mm6936a4  
28
- 29 31 Bom J, Bakx P, Schut F, *et al.* The Impact of Informal Caregiving for Older Adults on the  
30 Health of Various Types of Caregivers: A Systematic Review. *The Gerontologist*  
31 Published Online First: 3 November 2018. doi:10.1093/geront/gny137  
32  
33  
34  
35  
36  
37  
38  
39  
40  
41  
42  
43  
44  
45  
46  
47  
48  
49  
50  
51  
52  
53  
54  
55  
56  
57  
58  
59  
60

**Table 1. Study sample characteristics (N=1231).**

|                                                                           |             |
|---------------------------------------------------------------------------|-------------|
| <b>Age mean (SD)</b>                                                      | 78.2 (8.3)  |
| <b>Age n (%)</b>                                                          |             |
| ≤80 years                                                                 | 642 (52.2%) |
| >80 years                                                                 | 589 (47.8%) |
| <b>Female n (%)</b>                                                       | 792 (64.3%) |
| <b>Education n (%)</b>                                                    |             |
| High school, university or above                                          | 809 (65.7%) |
| Elementary school                                                         | 422 (34.3%) |
| <b>Living alone n (%)</b>                                                 | 616 (50.2%) |
| <b>COVID-19-related symptoms n (%)</b>                                    |             |
| 0                                                                         | 801 (65.1%) |
| 1                                                                         | 183 (14.9%) |
| 2+                                                                        | 247 (20.0%) |
| <b>Tested for COVID-19 n (%)</b>                                          |             |
| Yes, positive                                                             | 9 (0.7%)    |
| Yes, negative/unknown                                                     | 53 (4.3%)   |
| <b>Sought medical care n (%)</b>                                          | 595 (48.6%) |
| <b>Found it difficult to access healthcare services<sup>a</sup> n (%)</b> | 79 (14.6%)  |
| <b>Hospitalized due to confirmed or suspected COVID-19 n (%)</b>          | 9 (0.7%)    |

<sup>a</sup> Subsample of those who sought medical care (n=540)

**Table 2. Psychological burden and behavioral changes in the study sample (N=1231) during the first COVID-19 outbreak in Stockholm (March-June 2020).**

| Psychological burden (n, %)                         |              |
|-----------------------------------------------------|--------------|
| <b>Worried about getting COVID-19</b>               |              |
| Not at all, slightly, moderately                    | 1032 (85.4%) |
| Very, extremely                                     | 176 (14.6%)  |
| <b>Worried about loved one getting COVID-19</b>     |              |
| Not at all, slightly, moderately                    | 907 (75.1%)  |
| Very, extremely                                     | 300 (24.9%)  |
| <b>Felt nervous/stressed</b>                        |              |
| Never, sometimes                                    | 1112 (91.9%) |
| Often, very often                                   | 98 (8.1%)    |
| <b>Felt lonely<sup>a</sup></b>                      |              |
| To a low extent (<5)                                | 790 (66.6%)  |
| To a high extent (≥5)                               | 396 (33.4%)  |
| <b>Affected by at least one item</b>                |              |
| 608 (49.8%)                                         |              |
| Reductions in social and physical activities (n, %) |              |
| <b>Social isolation<sup>b</sup></b>                 | 195 (16.3%)  |
| <b>Reduced light physical activity</b>              | 352 (29.4%)  |
| <b>Reduced vigorous physical activity</b>           | 326 (27.3%)  |
| <b>Affected by at least one item</b>                | 676 (55.3%)  |
| Reductions in care use (n, %)                       |              |
| <b>Refrained from seeking medical care</b>          | 126 (10.3%)  |
| <b>Received less home care<sup>c,d</sup></b>        | 16 (8.9%)    |
| <b>Affected by at least one item</b>                | 139 (11.3%)  |
| Sum of collateral damage dimensions (n, %)          |              |
| <b>0</b>                                            | 273 (22.2%)  |
| <b>1</b>                                            | 537 (43.7%)  |
| <b>2</b>                                            | 371 (30.2%)  |
| <b>3</b>                                            | 48 (3.9%)    |

<sup>a</sup> Based on UCLA Three-Item Loneliness Scale (range: 3-9)

<sup>b</sup> Reduction in physical communication without an increase in phone and/or video communication

<sup>c</sup> Reduction in formal care without an increase in informal care

<sup>d</sup> Subsample of those who received home care before the pandemic (n=180)

**Table 3. Association (odds ratios and 95% confidence intervals) between psychological burden and behavioral changes and sociodemographic factors (N=1231) during the first COVID-19 outbreak in Stockholm (March-June 2020). Models mutually adjusted by all sociodemographic factors.**

|                                                   | Oldest vs youngest old | p-value | Female vs male      | p-value | Low vs high education <sup>a</sup> | p-value | Living alone vs not living alone | p-value |
|---------------------------------------------------|------------------------|---------|---------------------|---------|------------------------------------|---------|----------------------------------|---------|
| <b>Psychological burden</b>                       |                        |         |                     |         |                                    |         |                                  |         |
| Worried about getting COVID-19                    | 0.62<br>[0.44,0.87]    | 0.006   | 1.41<br>[0.99,2.03] | 0.060   | 0.90<br>[0.64,1.28]                | 0.575   | 0.91<br>[0.65,1.29]              | 0.597   |
| Worried about loved one getting COVID-19          | 0.84<br>[0.64,1.11]    | 0.215   | 1.54<br>[1.15,2.07] | 0.004   | 0.99<br>[0.75,1.33]                | 0.632   | 0.63<br>[0.47,0.84]              | 0.001   |
| Felt nervous/stressed                             | 0.73<br>[0.47,1.13]    | 0.156   | 2.08<br>[1.23,3.52] | 0.006   | 1.04<br>[0.66,1.62]                | 0.860   | 1.36<br>[0.87,2.16]              | 0.175   |
| Felt lonely <sup>b</sup>                          | 1.08<br>[0.84,1.40]    | 0.551   | 1.61<br>[1.22,2.12] | 0.001   | 0.83<br>[0.64,1.09]                | 0.185   | 1.50<br>[1.15,1.95]              | 0.003   |
| Affected by at least one item                     | 0.94<br>[0.74,1.19]    | 0.597   | 1.90<br>[1.48,2.45] | <0.001  | 0.97<br>[0.75,1.24]                | 0.777   | 1.13<br>[0.89,1.45]              | 0.320   |
| <b>Reductions in social and physical activity</b> |                        |         |                     |         |                                    |         |                                  |         |
| Social isolation <sup>c</sup>                     | 1.19<br>[0.86,1.63]    | 0.295   | 0.64<br>[0.46,0.89] | 0.008   | 1.31<br>[0.95,1.82]                | 0.104   | 1.13<br>[0.81,1.58]              | 0.476   |
| Reduced light physical activity                   | 1.82<br>[1.40,2.37]    | <0.001  | 1.58<br>[1.19,2.11] | 0.002   | 0.94<br>[0.72,1.24]                | 0.680   | 1.06<br>[0.80,1.39]              | 0.692   |
| Reduced vigorous physical activity                | 0.55<br>[0.42,0.72]    | <0.001  | 1.32<br>[0.99,1.76] | 0.056   | 0.79<br>[0.60,1.06]                | 0.116   | 0.76<br>[0.57,1.00]              | 0.05    |
| Affected by at least one item                     | 1.17<br>[0.93,1.49]    | 0.181   | 1.30<br>[1.08,1.78] | 0.009   | 1.05<br>[0.82,1.34]                | 0.691   | 0.89<br>[0.70,1.14]              | 0.373   |
| <b>Reductions in care use</b>                     |                        |         |                     |         |                                    |         |                                  |         |
| Refrained from seeking medical care               | 0.98<br>[0.67,1.44]    | 0.928   | 1.05<br>[0.70,1.58] | 0.801   | 0.94<br>[0.63,1.40]                | 0.761   | 1.10<br>[0.74,1.64]              | 0.637   |
| Received less home care <sup>d,e</sup>            | 0.14<br>[0.03,0.62]    | 0.010   | 3.58<br>[0.63,20.4] | 0.151   | 3.98<br>[1.15,13.7]                | 0.029   | 1.31<br>[0.30,5.63]              | 0.718   |
| Affected by at least one item                     | 1.06<br>[0.73,1.53]    | 0.757   | 1.10<br>[0.74,1.63] | 0.643   | 1.11<br>[0.76,1.62]                | 0.595   | 1.15<br>[0.79,1.69]              | 0.468   |

<sup>a</sup> Low = elementary, high = high school, university or above

<sup>b</sup> Based on UCLA Three-Item Loneliness Scale (range: 3-9)

<sup>c</sup> Defined as reduction in physical communication without an increase in phone and/or video communication

<sup>d</sup> Defined as reduction in formal care without an increase in informal care

<sup>e</sup> Subsample of those who received home care before the pandemic (n=180)

1  
2  
3 **Figure 1. Adherence to preventive recommendations (left) and sources of information (right)**  
4 **related to COVID-19 during the first outbreak in Stockholm (March-June 2020).**  
5  
6  
7  
8  
9  
10  
11  
12  
13  
14

15 **Figure 2. Association (odds ratios and 95% confidence intervals) between number of**  
16 **experienced dimensions of collateral damage and sociodemographic factors (N=1231) during**  
17 **the first COVID-19 outbreak in Stockholm (March-June 2020). Models mutually adjusted by all**  
18 **sociodemographic factors.**  
19  
20  
21  
22  
23  
24  
25  
26  
27  
28  
29  
30  
31  
32  
33  
34  
35  
36  
37  
38  
39  
40  
41  
42  
43  
44  
45  
46  
47  
48  
49  
50  
51  
52  
53  
54  
55  
56  
57  
58  
59  
60



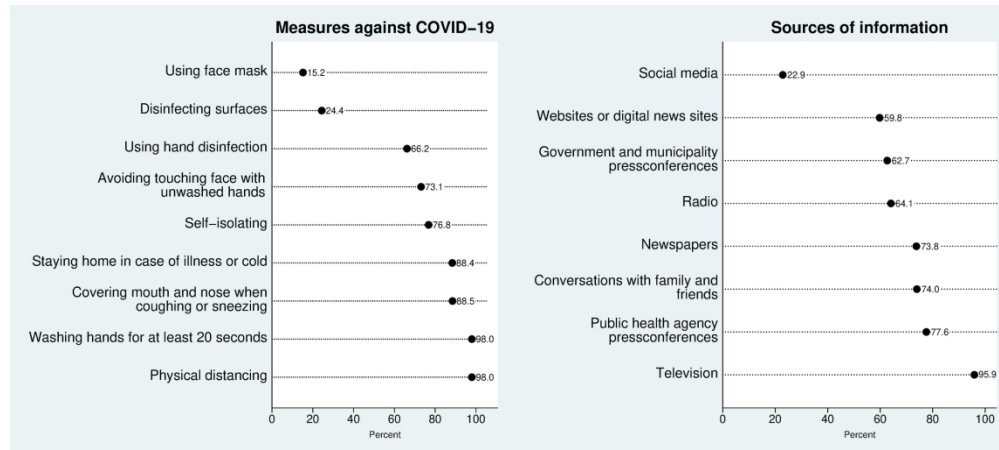

Figure 1. Adherence to preventive recommendations (left) and sources of information (right) related to COVID-19 during the first outbreak in Stockholm (March-June 2020).

228x101mm (300 x 300 DPI)

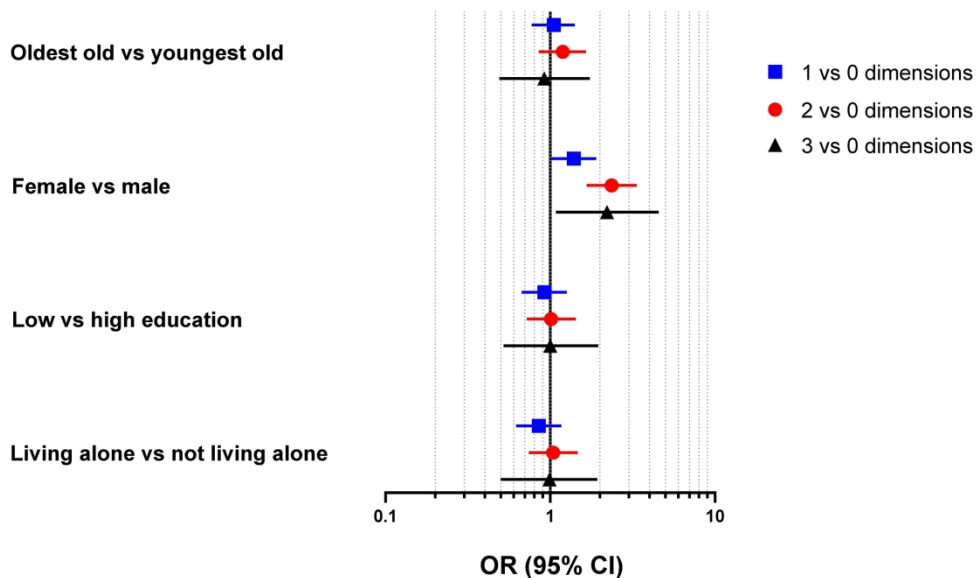

Figure 2. Association (odds ratios and 95% confidence intervals) between number of experienced dimensions of collateral damage and sociodemographic factors (N=1231) during the first COVID-19 outbreak in Stockholm (March-June 2020). Models mutually adjusted by all sociodemographic factors.

220x129mm (300 x 300 DPI)

**Supplementary Table 1. Psychological distress and behavioral changes in the study sample (N=1231) by age and sex during the first COVID-19 outbreak in Stockholm (March-June 2020).**

|                                                     | Age         |             | <i>p</i> -value | Sex         |             | <i>p</i> -value |
|-----------------------------------------------------|-------------|-------------|-----------------|-------------|-------------|-----------------|
|                                                     | Under 80    | Over 80     |                 | Male        | Female      |                 |
|                                                     | n=809       | n=422       |                 | n=439       | n=792       |                 |
| <b>Psychological distress</b>                       |             |             |                 |             |             |                 |
| <b>Worried about getting COVID-19</b>               |             |             | 0.003           |             |             | 0.13            |
| Not at all, slightly, moderately                    | 522 (82.6%) | 510 (88.5%) |                 | 378 (87.5%) | 654 (84.3%) |                 |
| Very, extremely                                     | 110 (17.4%) | 66 (11.5%)  |                 | 54 (12.5%)  | 122 (15.7%) |                 |
| <b>Worried about loved one getting COVID-19</b>     |             |             | 0.054           |             |             | 0.063           |
| Not at all, slightly, moderately                    | 462 (72.9%) | 445 (77.7%) |                 | 338 (78.2%) | 569 (73.4%) |                 |
| Very, extremely                                     | 172 (27.1%) | 128 (22.3%) |                 | 94 (21.8%)  | 206 (26.6%) |                 |
| <b>Felt nervous/stressed</b>                        |             |             | 0.45            |             |             | 0.002           |
| Never, sometimes                                    | 580 (91.3%) | 532 (92.5%) |                 | 410 (95.1%) | 702 (90.1%) |                 |
| Often or very often                                 | 55 (8.7%)   | 43 (7.5%)   |                 | 21 (4.9%)   | 77 (9.9%)   |                 |
| <b>Felt lonely<sup>a</sup></b>                      |             |             | 0.19            |             |             | <0.001          |
| To a low extent (<5)                                | 429 (68.3%) | 361 (64.7%) |                 | 319 (74.7%) | 471 (62.1%) |                 |
| To a high extent (≥5)                               | 199 (31.7%) | 197 (35.3%) |                 | 108 (25.3%) | 288 (37.9%) |                 |
| <b>Affected by at least one item</b>                | 318 (49.7%) | 290 (49.8%) | 0.96            | 171 (39.1%) | 437 (55.7%) | <0.001          |
| <b>Reductions in social and physical activities</b> |             |             |                 |             |             |                 |
| <b>Social isolation<sup>b</sup></b>                 | 94 (14.9%)  | 101 (17.7%) | 0.19            | 97 (22.8%)  | 255 (33.0%) | <0.001          |
| <b>Reduced light physical activity</b>              | 145 (23.2%) | 207 (36.2%) | <0.001          | 110 (26.0%) | 216 (28.1%) | 0.45            |
| <b>Reduced vigorous physical activity</b>           | 209 (33.6%) | 117 (20.5%) | <0.001          | 220 (50.5%) | 456 (58.0%) | 0.011           |
| <b>Affected by at least one item</b>                | 341 (53.3%) | 335 (57.6%) | 0.13            | 83 (19.4%)  | 112 (14.5%) | 0.025           |
| <b>Reductions in care use</b>                       |             |             |                 |             |             |                 |
| <b>Refrained from seeking medical care</b>          | 66 (10.3%)  | 60 (10.3%)  | 0.99            | 43 (9.9%)   | 83 (10.5%)  | 0.71            |
| <b>Received less home care<sup>c,d</sup></b>        | 4 (22.2%)   | 12 (7.4%)   | 0.036           | 2 (4.1%)    | 14 (10.7%)  | 0.17            |
| <b>Affected by at least one item</b>                | 69 (10.8%)  | 70 (11.9%)  | 0.52            | 45 (10.3%)  | 94 (11.9%)  | 0.40            |
| <b>Sum of collateral damage dimensions</b>          |             |             |                 |             |             |                 |
| <b>0</b>                                            | 147 (22.9%) | 126 (21.4%) | 0.40            | 123 (28.1%) | 150 (19.0%) | <0.001          |
| <b>1</b>                                            | 287 (44.8%) | 250 (42.5%) |                 | 207 (47.3%) | 330 (41.7%) |                 |
| <b>2</b>                                            | 180 (28.1%) | 191 (32.5%) |                 | 95 (21.7%)  | 276 (34.9%) |                 |
| <b>3</b>                                            | 27 (4.2%)   | 21 (3.6%)   |                 | 13 (3.0%)   | 35 (4.4%)   |                 |

<sup>a</sup> Based on UCLA Three-Item Loneliness Scale (range: 3-9)

<sup>b</sup> Reduction in physical communication without an increase in phone and/or video communication

<sup>c</sup> Reduction in formal care without an increase in informal care

<sup>d</sup> Subsample of those who received home care before the pandemic (n=180)

**Supplementary Table 2. Psychological distress and behavioral changes in the study sample (N=1231) by education and living arrangement during the first COVID-19 outbreak in Stockholm (March-June 2020).**

|                                                     | Education <sup>a</sup> |             | <i>p</i> -value | Living arrangement |                  | <i>p</i> -value |
|-----------------------------------------------------|------------------------|-------------|-----------------|--------------------|------------------|-----------------|
|                                                     | Low                    | High        |                 | Living alone       | Not living alone |                 |
|                                                     | n=422                  | n=809       |                 | n=612              | n=616            |                 |
| <b>Worried about getting COVID-19</b>               |                        |             | 0.35            |                    |                  | 0.46            |
| Not at all, slightly, moderately                    | 360 (86.7%)            | 672 (84.7%) |                 | 508 (84.7%)        | 523 (86.2%)      |                 |
| Very, extremely                                     | 55 (13.3%)             | 121 (15.3%) |                 | 92 (15.3%)         | 84 (13.8%)       |                 |
| <b>Worried about loved one getting COVID-19</b>     |                        |             | 0.66            |                    |                  | 0.004           |
| Not at all, slightly, moderately                    | 312 (75.9%)            | 595 (74.7%) |                 | 433 (71.6%)        | 473 (78.7%)      |                 |
| Very, extremely                                     | 99 (24.1%)             | 201 (25.3%) |                 | 172 (28.4%)        | 128 (21.3%)      |                 |
| <b>Felt nervous/stressed</b>                        |                        |             | 0.62            |                    |                  | 0.042           |
| Never, sometimes                                    | 381 (91.4%)            | 731 (92.2%) |                 | 566 (93.6%)        | 545 (90.4%)      |                 |
| Often or very often                                 | 36 (8.6%)              | 62 (7.8%)   |                 | 39 (6.4%)          | 58 (9.6%)        |                 |
| <b>Felt lonely<sup>b</sup></b>                      |                        |             | 0.81            |                    |                  | <0.001          |
| To a low extent (<5)                                | 269 (67.1%)            | 521 (66.4%) |                 | 431 (72.4%)        | 358 (60.8%)      |                 |
| To a high extent (≥5)                               | 132 (32.9%)            | 264 (33.6%) |                 | 164 (27.6%)        | 231 (39.2%)      |                 |
| <b>Affected by at least one item</b>                | 213 (50.7%)            | 395 (49.3%) | 0.63            | 280 (46.1%)        | 326 (53.3%)      | 0.012           |
| <b>Reductions in social and physical activities</b> |                        |             |                 |                    |                  |                 |
| <b>Social isolation<sup>c</sup></b>                 | 76 (18.6%)             | 119 (15.0%) | 0.11            | 95 (15.8%)         | 100 (16.7%)      | 0.67            |
| <b>Reduced light physical activity</b>              | 129 (31.2%)            | 223 (28.4%) | 0.31            | 156 (26.2%)        | 196 (32.7%)      | 0.013           |
| <b>Reduced vigorous physical activity</b>           | 94 (22.9%)             | 232 (29.7%) | 0.012           | 183 (31.0%)        | 142 (23.7%)      | 0.005           |
| <b>Affected by at least one item</b>                | 239 (57.0%)            | 437 (54.4%) | 0.38            | 334 (54.9%)        | 341 (55.7%)      | 0.78            |
| <b>Reductions in care use</b>                       |                        |             |                 |                    |                  |                 |
| <b>Refrained from seeking medical care</b>          | 42 (10.1%)             | 84 (10.4%)  | 0.85            | 60 (9.9%)          | 66 (10.8%)       | 0.61            |
| <b>Received less home care<sup>d,e</sup></b>        | 12 (14%)               | 4 (4%)      | 0.025           | 3 (6.7%)           | 13 (9.6%)        | 0.55            |
| <b>Affected by at least one item</b>                | 52 (12.4%)             | 87 (10.8%)  | 0.41            | 63 (10.3%)         | 76 (12.4%)       | 0.27            |
| <b>Sum of collateral damage dimensions</b>          |                        |             |                 |                    |                  |                 |
| <b>0</b>                                            | 92 (21.8%)             | 181 (22.4%) | 0.38            | 141 (23.1%)        | 132 (21.4%)      | 0.046           |
| <b>1</b>                                            | 173 (41.0%)            | 364 (45.1%) |                 | 285 (46.6%)        | 251 (40.7%)      |                 |
| <b>2</b>                                            | 140 (33.2%)            | 231 (28.6%) |                 | 163 (26.7%)        | 207 (33.6%)      |                 |
| <b>3</b>                                            | 17 (4.0%)              | 31 (3.8%)   |                 | 22 (3.6%)          | 26 (4.2%)        |                 |

<sup>a</sup> Low = elementary, high = high school, university or above

<sup>b</sup> Based on UCLA Three-Item Loneliness Scale (range: 3-9)

<sup>c</sup> Reduction in physical communication without an increase in phone and/or video communication

<sup>d</sup> Reduction in formal care without an increase in informal care

<sup>e</sup> Subsample of those who received home care before the pandemic (n=180)

STROBE Statement—Checklist of items that should be included in reports of *cross-sectional studies*

|                              | <b>Item No</b> | <b>Recommendation</b>                                                                                                                                                                             | <b>Page No</b> |
|------------------------------|----------------|---------------------------------------------------------------------------------------------------------------------------------------------------------------------------------------------------|----------------|
| <b>Title and abstract</b>    | 1              | (a) Indicate the study's design with a commonly used term in the title or the abstract                                                                                                            | 2              |
|                              |                | (b) Provide in the abstract an informative and balanced summary of what was done and what was found                                                                                               | 2              |
| <b>Introduction</b>          |                |                                                                                                                                                                                                   |                |
| Background/rationale         | 2              | Explain the scientific background and rationale for the investigation being reported                                                                                                              | 4-5            |
| Objectives                   | 3              | State specific objectives, including any prespecified hypotheses                                                                                                                                  | 5              |
| <b>Methods</b>               |                |                                                                                                                                                                                                   |                |
| Study design                 | 4              | Present key elements of study design early in the paper                                                                                                                                           | 5              |
| Setting                      | 5              | Describe the setting, locations, and relevant dates, including periods of recruitment, exposure, follow-up, and data collection                                                                   | 5-6            |
| Participants                 | 6              | (a) Give the eligibility criteria, and the sources and methods of selection of participants                                                                                                       | 5              |
| Variables                    | 7              | Clearly define all outcomes, exposures, predictors, potential confounders, and effect modifiers. Give diagnostic criteria, if applicable                                                          | 5-7            |
| Data sources/<br>measurement | 8*             | For each variable of interest, give sources of data and details of methods of assessment (measurement). Describe comparability of assessment methods if there is more than one group              | 5-7            |
| Bias                         | 9              | Describe any efforts to address potential sources of bias                                                                                                                                         | NA             |
| Study size                   | 10             | Explain how the study size was arrived at                                                                                                                                                         | 5              |
| Quantitative variables       | 11             | Explain how quantitative variables were handled in the analyses. If applicable, describe which groupings were chosen and why                                                                      | 6              |
| Statistical methods          | 12             | (a) Describe all statistical methods, including those used to control for confounding                                                                                                             | 7              |
|                              |                | (b) Describe any methods used to examine subgroups and interactions                                                                                                                               | NA             |
|                              |                | (c) Explain how missing data were addressed                                                                                                                                                       | 7              |
|                              |                | (d) If applicable, describe analytical methods taking account of sampling strategy                                                                                                                | NA             |
|                              |                | (e) Describe any sensitivity analyses                                                                                                                                                             | NA             |
| <b>Results</b>               |                |                                                                                                                                                                                                   |                |
| Participants                 | 13*            | (a) Report numbers of individuals at each stage of study—eg numbers potentially eligible, examined for eligibility, confirmed eligible, included in the study, completing follow-up, and analysed | 5              |

|                          |     |                                                                                                                                                                                                              |                                                                               |
|--------------------------|-----|--------------------------------------------------------------------------------------------------------------------------------------------------------------------------------------------------------------|-------------------------------------------------------------------------------|
|                          |     | (b) Give reasons for non-participation at each stage                                                                                                                                                         | 5                                                                             |
|                          |     | (c) Consider use of a flow diagram                                                                                                                                                                           | NA                                                                            |
| Descriptive data         | 14* | (a) Give characteristics of study participants (eg demographic, clinical, social) and information on exposures and potential confounders                                                                     | 7-8                                                                           |
|                          |     | (b) Indicate number of participants with missing data for each variable of interest                                                                                                                          | Very high response rates; missingness can be inferred from supplementary data |
| Outcome data             | 15* | Report numbers of outcome events or summary measures                                                                                                                                                         | 8                                                                             |
| Main results             | 16  | (a) Give unadjusted estimates and, if applicable, confounder-adjusted estimates and their precision (eg, 95% confidence interval). Make clear which confounders were adjusted for and why they were included | In all tables and figures.                                                    |
|                          |     | (b) Report category boundaries when continuous variables were categorized                                                                                                                                    | In tables and their footnotes                                                 |
|                          |     | (c) If relevant, consider translating estimates of relative risk into absolute risk for a meaningful time period                                                                                             | NA                                                                            |
| Other analyses           | 17  | Report other analyses done—eg analyses of subgroups and interactions, and sensitivity analyses                                                                                                               | NA                                                                            |
| <b>Discussion</b>        |     |                                                                                                                                                                                                              |                                                                               |
| Key results              | 18  | Summarise key results with reference to study objectives                                                                                                                                                     | 9                                                                             |
| Limitations              | 19  | Discuss limitations of the study, taking into account sources of potential bias or imprecision. Discuss both direction and magnitude of any potential bias                                                   | 11-12                                                                         |
| Interpretation           | 20  | Give a cautious overall interpretation of results considering objectives, limitations, multiplicity of analyses, results from similar studies, and other relevant evidence                                   | 9-11                                                                          |
| Generalisability         | 21  | Discuss the generalisability (external validity) of the study results                                                                                                                                        | 12                                                                            |
| <b>Other information</b> |     |                                                                                                                                                                                                              |                                                                               |
| Funding                  | 22  | Give the source of funding and the role of the funders for the present study and, if applicable, for the original study on which the present article is based                                                | 13                                                                            |

\*Give information separately for exposed and unexposed groups.

**Note:** An Explanation and Elaboration article discusses each checklist item and gives methodological background and published examples of transparent reporting. The STROBE checklist is best used in conjunction with this article (freely available on the Web sites of PLoS Medicine at <http://www.plosmedicine.org/>, Annals of Internal Medicine at <http://www.annals.org/>, and Epidemiology at <http://www.epidem.com/>). Information on the STROBE Initiative is available at [www.strobe-statement.org](http://www.strobe-statement.org).

# BMJ Open

## COVID-19 collateral damage: cross-sectional study on the psychological burden and behavioral changes among older adults during the first outbreak in Stockholm, Sweden

|                                 |                                                                                                                                                                                                                                                                                                                                                                                                                                                                                                                                                                                                                                                                     |
|---------------------------------|---------------------------------------------------------------------------------------------------------------------------------------------------------------------------------------------------------------------------------------------------------------------------------------------------------------------------------------------------------------------------------------------------------------------------------------------------------------------------------------------------------------------------------------------------------------------------------------------------------------------------------------------------------------------|
| Journal:                        | <i>BMJ Open</i>                                                                                                                                                                                                                                                                                                                                                                                                                                                                                                                                                                                                                                                     |
| Manuscript ID                   | bmjopen-2021-058422.R1                                                                                                                                                                                                                                                                                                                                                                                                                                                                                                                                                                                                                                              |
| Article Type:                   | Original research                                                                                                                                                                                                                                                                                                                                                                                                                                                                                                                                                                                                                                                   |
| Date Submitted by the Author:   | 17-Nov-2021                                                                                                                                                                                                                                                                                                                                                                                                                                                                                                                                                                                                                                                         |
| Complete List of Authors:       | Beridze, Giorgi; Karolinska Institute, Aging Research Center, Department of Neurobiology, Care Sciences and Society<br>Triolo, Federico; Karolinska Institute, Aging Research Center, Department of Neurobiology, Care Sciences and Society<br>Grande, Giulia; Karolinska Institute, Aging Research Center, Department of Neurobiology, Care Sciences and Society<br>Fratiglioni, Laura; Karolinska Institute, Aging Research Center, Department of Neurobiology, Care Sciences and Society; Stockholm Gerontology Research Center<br>Calderón-Larrañaga, Amaia; Karolinska Institute, Aging Research Center, Department of Neurobiology, Care Sciences and Society |
| <b>Primary Subject Heading</b>: | Epidemiology                                                                                                                                                                                                                                                                                                                                                                                                                                                                                                                                                                                                                                                        |
| Secondary Subject Heading:      | Geriatric medicine                                                                                                                                                                                                                                                                                                                                                                                                                                                                                                                                                                                                                                                  |
| Keywords:                       | COVID-19, EPIDEMIOLOGY, GERIATRIC MEDICINE                                                                                                                                                                                                                                                                                                                                                                                                                                                                                                                                                                                                                          |
|                                 |                                                                                                                                                                                                                                                                                                                                                                                                                                                                                                                                                                                                                                                                     |

SCHOLARONE™  
Manuscripts



I, the Submitting Author has the right to grant and does grant on behalf of all authors of the Work (as defined in the below author licence), an exclusive licence and/or a non-exclusive licence for contributions from authors who are: i) UK Crown employees; ii) where BMJ has agreed a CC-BY licence shall apply, and/or iii) in accordance with the terms applicable for US Federal Government officers or employees acting as part of their official duties; on a worldwide, perpetual, irrevocable, royalty-free basis to BMJ Publishing Group Ltd ("BMJ") its licensees and where the relevant Journal is co-owned by BMJ to the co-owners of the Journal, to publish the Work in this journal and any other BMJ products and to exploit all rights, as set out in our [licence](#).

The Submitting Author accepts and understands that any supply made under these terms is made by BMJ to the Submitting Author unless you are acting as an employee on behalf of your employer or a postgraduate student of an affiliated institution which is paying any applicable article publishing charge ("APC") for Open Access articles. Where the Submitting Author wishes to make the Work available on an Open Access basis (and intends to pay the relevant APC), the terms of reuse of such Open Access shall be governed by a Creative Commons licence – details of these licences and which [Creative Commons](#) licence will apply to this Work are set out in our licence referred to above.

Other than as permitted in any relevant BMJ Author's Self Archiving Policies, I confirm this Work has not been accepted for publication elsewhere, is not being considered for publication elsewhere and does not duplicate material already published. I confirm all authors consent to publication of this Work and authorise the granting of this licence.



**TITLE**

COVID-19 collateral damage: cross-sectional study on the psychological burden and behavioral changes among older adults during the first outbreak in Stockholm, Sweden

**AUTHORS**

Giorgi Beridze<sup>1</sup>, Federico Triolo<sup>1</sup>, Giulia Grande<sup>1</sup>, Laura Fratiglioni<sup>1,2</sup>, Amaia Calderón-Larrañaga<sup>1</sup>

**AFFILIATIONS**

1. Aging Research Center, Department of Neurobiology, Care Sciences and Society, Karolinska Institutet-Stockholm University, 17165 Solna, Sweden
2. Stockholm Gerontology Research Center, Stiftelsen Stockholms läns Äldrecentrum, 113 46 Stockholm, Sweden

**CORRESPONDING AUTHOR**

Giorgi Beridze, MD, MMSc

Tomtebodavägen 18a, Solna, Sweden 17165

giorgi.beridze@ki.se

**KEYWORDS**

COVID-19; collateral damage; restrictions; older adults

**WORD COUNT:** 2750

## ABSTRACT

**Objectives:** To explore the indirect, negative effects of COVID-19 restrictions (collateral damage) on the lives and health of older adults living in central Stockholm, and to characterize the sociodemographic profile of those with the highest susceptibility to this damage.

**Design:** Cross-sectional study.

**Setting:** District of Kungsholmen in Stockholm, Sweden.

**Participants:** Older adults 68+ years old (n=1231) who participated in the *ad-hoc* COVID-19-related phone questionnaire administered by trained staff between May and June 2020 and had previously attended the regular follow-up assessment of the Swedish National study on Aging and Care in Kungsholmen (SNAC-K) during 2016-2019.

**Primary and secondary outcome measures:** Three dimensions of collateral damage: psychological burden (feelings of worry, stress and loneliness), reductions in social and physical activities, and reductions in medical and social care use since the beginning of the pandemic. Logistic regression models were used to test the association between age, sex, education and living arrangement, and the risk of collateral damage.

**Results:** Vast majority of participants adhered to the recommendations, with over three quarters practicing self-isolation (n=928). Half of the sample reported psychological burden, 55.3% reported reductions in social or physical activity, and 11.3% reported decreased medical or social care use. 77.8% were affected by at least one of the three collateral damage dimensions. Female sex was the strongest sociodemographic predictor of both individual and co-occurring dimensions of collateral damage.

**Conclusions:** COVID-19 and its restrictions during the first half of 2020 had a negative effect on the health and lives of a majority of elderly living in central Stockholm. Women were at a

1  
2  
3 higher risk of these negative consequences. We emphasize the need for predefined, evidence-  
4 based interventions to address these negative consequences.  
5  
6  
7

## 8 **STRENGTHS AND LIMITATIONS OF THIS STUDY**

9

- 10  
11 • This study uses a large sample of older adults from a well-characterized population-  
12 based study (SNAC-K)  
13
- 14  
15 • Several dimensions of the indirect, negative effects (collateral damage) of the COVID-  
16 19 pandemic are explored in this study  
17
- 18  
19 • As Sweden's response to COVID-19 differed from most countries, this study provides  
20 a unique opportunity of comparison with other settings  
21
- 22  
23 • The cross-sectional design of this study does not allow to establish temporality between  
24 the onset of the pandemic and studied outcomes  
25
- 26  
27 • The results of this study may not be generalizable to the entire elderly population in  
28 Sweden as participants are from an urban, affluent area in Stockholm  
29  
30  
31  
32  
33  
34  
35  
36  
37  
38  
39  
40  
41  
42  
43  
44  
45  
46  
47  
48  
49  
50  
51  
52  
53  
54  
55  
56  
57  
58  
59  
60

## INTRODUCTION

The outbreak caused by the novel coronavirus, SARS-CoV2, was declared a global pandemic by the World Health Organization (WHO) on March 11<sup>th</sup> 2020, coinciding with the date of the first confirmed death in Sweden. Early on, it was identified that older adults were at a significantly higher risk of mortality from COVID-19. Indeed, as of January 18<sup>th</sup> 2021, 91% of deaths attributed to COVID-19 in Sweden have happened in those aged 70 and above [1]. Later on, additional prognostic factors were identified, including male sex, socioeconomic disadvantage, the presence of comorbidities and frailty [2–5].

In response to the pandemic, most countries have implemented strict measures to help curb the spread of the virus and reduce mortality. Sweden's response to COVID-19 differed from most countries by not implementing strict lockdowns and restrictions, but instead relying on high voluntary adherence to the recommendations proposed by the Public Health Agency. The general recommendations included keeping good hand hygiene, practicing social distancing and avoiding contact if having any symptoms [6]. On top of these, the specific recommendations for the elderly were to stay at home, avoid social gatherings and public transportation, but to remain physically active outdoors in a safe manner [6].

The importance of looking beyond mortality and morbidity when assessing national response strategies for COVID-19 has been raised [7]. Stay-at-home orders and lack of contact with loved ones put elderly at risk of loneliness and social isolation, which, in turn, are known to have negative effects, particularly in old age [8]. Reduced physical activity and sedentarism have detrimental effects on physical and mental health [9,10]. Additionally, due to the overburdening of healthcare services and reduced access to medical, social and informal care, new conditions may not be timely diagnosed, and existing health conditions may be exacerbated. These consequences can be considered indirect, negative effects (i.e. collateral damage) of COVID-19 restrictions.

1  
2  
3 While several studies have examined the distribution of COVID-19 mortality among Swedish  
4 older adults by sex, socioeconomic and household factors [11–13], little is known on the  
5 collateral damage of these restrictions. To the best of our knowledge, only one study has  
6 examined the mental health consequences of the Swedish strategy on the elderly [14], and no  
7 study has looked into other dimensions such as psychological wellbeing and/or behavioral  
8 changes. Thus, the aims of this study were to explore different dimensions of the collateral  
9 damage linked to COVID-19 during the first epidemic outbreak in an older population of central  
10 Stockholm, as well as to characterize the sociodemographic profile of those with the highest  
11 susceptibility to this damage.  
12  
13  
14  
15  
16  
17  
18  
19  
20  
21  
22  
23  
24  
25  
26

## 27 **METHODS**

### 28 **Study population**

29  
30 Study population consisted of 1231 older adults aged between 68 and 103, participating in the  
31 Swedish National study on Aging and Care in Kungsholmen (SNAC-K). SNAC-K is a  
32 longitudinal study including a random sample of older adults aged 60 years and above living in  
33 the Kungsholmen area of Stockholm, Sweden. All SNAC-K participants who had participated  
34 in the regular follow-up assessment during 2016-2019 were invited to participate in a telephone  
35 interview aimed at monitoring preventive behaviors and the direct and indirect health  
36 consequences of the COVID-19 pandemic. Telephone interviews were conducted between May  
37 and June 2020 (95%) by trained SNAC-K staff, following a multi-choice questionnaire that was  
38 *ad hoc* developed by the SNAC-K data collection team as well as experts in geriatric medicine,  
39 neurology and public health. The questionnaire comprised a selection of items from the original  
40 SNAC-K assessments and from the WHO Europe survey tool to monitor the public's risk  
41 perceptions, behaviors, trust and knowledge concerning the pandemic outbreak response [15].  
42  
43  
44  
45  
46  
47  
48  
49  
50  
51  
52  
53  
54  
55  
56  
57  
58  
59  
60 The interview was preceded by a brief explanation whereby participants were told that all

1  
2  
3 questions referred specifically to the pandemic context. Exclusion criteria included living in  
4  
5 care and nursing homes, known diagnosis of dementia and very impaired hearing. The response  
6  
7 rate was 91.9%. Subjects who refused to participate or could not be contacted had similar age  
8  
9 and educational attainment to those who participated, but were more likely to be male (45.4%  
10  
11 vs 35.7%,  $p=0.044$ ).

### 12 13 14 15 **Collateral damage**

16  
17  
18 In this study we examined three dimensions of collateral damage: psychological burden and  
19  
20 two aspects related to behavioral changes, i.e. reductions in social and physical activities, and  
21  
22 in medical and social care use. All questions explicitly asked participants about changes since  
23  
24 the beginning of the pandemic. Psychological burden was assessed with variables related to  
25  
26 worrying about being affected by COVID-19 (very/extremely vs. not at  
27  
28 all/somewhat/moderately), worrying about loved ones being affected by COVID-19  
29  
30 (very/extremely vs. not at all/somewhat/moderately), feeling nervous and/or stressed  
31  
32 (often/very often vs. never/sometimes), and loneliness ( $\geq 5$  vs.  $< 5$  on the Three-Item Loneliness  
33  
34 Scale [16]). The three questions on COVID19-related feelings of worry, nervousness or stress  
35  
36 were taken directly from the first version of the WHO Europe survey tool mentioned above.  
37  
38 The Three-Item Loneliness Scale is a short version of the R-UCLA Loneliness Scale that is part  
39  
40 of several European aging cohorts such as the Survey of Health, Ageing and Retirement in  
41  
42 Europe (SHARE) or the English Longitudinal Study of Ageing (ELSA). It measures indirect  
43  
44 loneliness based on the items “companionship”, “left out”, and “isolated”, which are answered  
45  
46 on a three point Likert scale (“often”, “some of the time”, “hardly ever or never”). The minimum  
47  
48 of the resulting score is 3 (“not lonely”) and the maximum is 9 (“very lonely”). Changes in  
49  
50 social and physical activities were measured by asking participants about reductions in social  
51  
52 interactions, reductions in light physical activity (yes/no) and reductions in vigorous physical  
53  
54 activity (yes/no). A reduction in social interactions, hereon referred to as social isolation, was  
55  
56  
57  
58  
59  
60

1  
2  
3 defined as a reduction in physical communication with family and friends without an increase  
4  
5 in phone and/or video communication. Care-related items included refraining from seeking  
6  
7 medical care (yes/no) and receiving reduced care at home. Reduced care at home was defined  
8  
9 as a decrease in the use of formal home-care services without an increase in received informal  
10  
11 care.  
12  
13

### 14 15 **Preventive measures and sources of information**

16  
17  
18 Participants were asked about their adherence to a list of 9 recommendations –both general and  
19  
20 those specific to elderly–, and the most common sources of information regarding the COVID-  
21  
22 19 pandemic.  
23  
24

### 25 26 **Sociodemographics**

27  
28 Sociodemographic variables in the present study included age, sex, education and living  
29  
30 arrangement. Age was dichotomized as youngest old ( $\leq 80$  years old) and oldest old ( $> 80$  years  
31  
32 old). Highest obtained education was dichotomized as low (elementary) and high (high school,  
33  
34 university, or above). Living arrangement was dichotomized into those who lived alone and  
35  
36 those who did not.  
37  
38

### 39 40 41 **Statistical analysis**

42  
43  
44 Characteristics of the study sample were reported as overall, as well as stratified by the four  
45  
46 sociodemographic variables. Between-group differences were assessed via two-tailed t-tests  
47  
48 and chi-square tests as appropriate. Binary logistic regression models were used to assess the  
49  
50 associations between sociodemographic variables and the different collateral damage  
51  
52 dimensions, as well as each item within these dimensions. All models were mutually adjusted  
53  
54 for all sociodemographic variables. All statistical tests were performed in StataSE 15  
55  
56 (StataCorp LLC, College Station, TX, USA). Significance level (alpha) was set at 0.05 for all  
57  
58 analyses.  
59  
60

### **Ethical considerations**

Verbal informed consent was obtained from all participants. The study was approved by the Regional Ethics Review Board in Stockholm (dnr: 2020-02497).

### **Patient and public involvement**

There was no direct public involvement either in the setting of the research questions or developing the study design.

## **RESULTS**

The mean age of participants was 78.2 years, 64.3% were female, 34.3% had elementary educational attainment and 50.2% lived alone (**Table 1**). Five percent of participants (n=62) reported being tested for COVID-19, 9 of which reported testing positive. Almost half of the sample (48.3%, n=595) sought medical care during the period March-June 2020, with 79 of them finding it more difficult to access it. Nine participants reported being hospitalized for suspected or confirmed COVID-19.

The most commonly reported preventive behaviors were physical distancing of at least two meters (98.0%) and washing hands for at least 20 seconds (98.0%), followed by covering mouth and nose when coughing or sneezing (88.5%) and staying home in case of illness or cold (88.4%) (**Figure 1**). Three quarters of the sample (76.8%) reported self-isolating. The least commonly reported measure was usage of face masks (15.2%). Most participants stayed up to date on the COVID-19 pandemic using television (95.9%); over three quarters (77.6%) reported following the Public Health Agency's press-conferences. Digital sources, such as social media and online news websites were the least reported sources (22.9% and 59.8% respectively).



1  
2  
3 Half of the sample experienced certain level of psychological burden, with the most common  
4 items being loneliness (33.4%) and worrying about loved ones getting COVID-19 (24.9%)  
5  
6  
7 **(Table 2)**. More than half (55.3%) experienced a reduction in either social or physical activities,  
8  
9 and 11.3% either refrained from seeking medical care or received less social care at home. In  
10  
11 total, 77.8% of participants (n=956) experienced at least one of the three dimensions of  
12  
13 collateral damage comprising psychological burden, reductions in social and physical activities,  
14  
15 and decreased medical and social care use. Almost half (43.7%) reported experiencing one  
16  
17 dimension of collateral damage, while the remainder (34.1%) experienced two or more.  
18  
19 Univariate associations between each of the four sociodemographic variables and the different  
20  
21 collateral damage dimensions are presented in **Supplementary Tables 1 and 2**.  
22  
23  
24  
25

26  
27 Women had higher odds of experiencing all items within the dimensions of psychological  
28  
29 burden and social and physical activity reduction **(Table 3)**. Within the dimension of  
30  
31 psychological burden, the oldest old had significantly lower odds of worrying about getting  
32  
33 COVID-19. Those who lived alone had significantly lower odds of worrying about loved ones  
34  
35 getting COVID-19, but higher odds of loneliness. Within the dimension of social and physical  
36  
37 activity reductions, the oldest old had significantly higher odds of reducing light physical  
38  
39 activity, while the oldest old and those who lived alone had lower odds of decreasing vigorous  
40  
41 activity. Within the dimension of medical and social care use reduction, those with lower  
42  
43 education had higher odds of receiving less care at home.  
44  
45  
46  
47

48  
49 Women were more likely to experience one (OR: 1.38, 95% CI: 1.01;1.90), two (OR: 2.36,  
50  
51 95% CI: 1.66;3.35) and all three (OR: 2.21, 95% CI: 1.08;4.55) collateral damage dimensions  
52  
53 compared to men **(Figure 2)**. No statistically significant differences were detected for age,  
54  
55 education and living arrangement in terms of the number of experienced dimensions of  
56  
57 collateral damage, after adjusting for the rest of sociodemographic factors.  
58  
59  
60

## DISCUSSION

In this study examining the collateral damage of COVID-19 restrictions in terms of psychological burden, reductions in social and physical activities, and decreased medical and social care use in a Swedish urban older population, we found that over three quarters of the sample was affected by at least one dimension, with women being at a considerably higher risk. We also showed that the vast majority of the study population adhered to the COVID-19 preventive measures during the first half of 2020.

### Interpretation of results

Adherence to national recommendations is an important factor in mitigating the negative effects of the COVID-19 pandemic. We found that participants in our study were well-informed about the pandemic and adopted low-risk behaviors during the first wave of COVID-19 outbreak. The majority of participants followed the Public Health Agency press-conferences, likely reflecting the high social and institutional trust in Sweden [14], and adhered to the Agency's strongly recommended preventive measures.

We observe a substantial impact of the pandemic on the mental health of the elderly, with half of the sample reporting psychological burden. A fair share of the sample reported worrying about themselves and their loved ones being affected by COVID-19. Interestingly, the latter seems to be of more concern, a finding that has been replicated in another Swedish survey [14]. Loneliness and feelings of stress were also prevalent in our sample. This is in line with a large body of research showing considerable effects of the pandemic on mental health outcomes [17,18]. The burden seems to be unevenly borne by women and, to a lesser extent, by those living alone. Indeed, previous research has shown that women are at a higher risk of poor mental health [18] and worrying about family [19] during the pandemic.

1  
2  
3 High adherence to self-isolation recommendations, combined with a decrease in physical  
4 contact with loved ones, puts older adults at risk of social isolation. Social isolation presents a  
5 major modern-day challenge and has been associated with several negative health outcomes,  
6 such as depression [20], frailty [21], cognitive decline [22] and low quality of life [23,24].  
7  
8 While we did observe a reduction in frequency of physical meetings with family, friends and  
9 neighbors, this was largely met with an increase in phone and video communication with them.  
10  
11 This is very important in the context of preventing the negative effects of loneliness and social  
12 isolation, as alternate forms of communication may buffer such effects [25,26].  
13  
14

15  
16 Concern has been raised about reduction in physical activity as a major collateral consequence  
17 of the pandemic restrictions, as low physical activity is linked to negative cardiovascular and  
18 metabolic outcomes [9], poor mental health [10], frailty [27], and insomnia [28], among others.  
19  
20 In spite of the Public Health Agency's recommendations for the elderly to remain physically  
21 active and spend time outdoors in a safe manner, we still found that up to a third of the sample  
22 had decreased their frequency of both light and vigorous physical activity. Furthermore, it is  
23 important to highlight that the reduction in light physical activity was more prominent among  
24 the oldest old, who, in all likelihood, were also doing less incidental physical activity, such as  
25 climbing the stairs or visiting the supermarket, due to self-isolation. They might encounter  
26 difficulties in returning to their former activity levels should the pandemic persist for a long  
27 time, which requires close monitoring from medical and social services.  
28  
29

30  
31 We found that subjects in our sample limited their contact with the healthcare system during  
32 the first wave of the pandemic, but when seeking for help, received it in a timely and satisfactory  
33 way. This is an important finding in a context where hospital overcrowding has emerged as an  
34 important challenge in many countries. Around 10% of our sample refrained from seeking  
35 medical care altogether, which may explain, among others, the reduction in cancer diagnosis  
36 by Swedish healthcare services compared to previous years [29]. Still, the proportion of those  
37  
38  
39  
40  
41  
42  
43  
44  
45  
46  
47  
48  
49  
50  
51  
52  
53  
54  
55  
56  
57  
58  
59  
60

1  
2  
3 refraining was significantly lower than in the US, where a third of the population aged 65+  
4  
5 reported delaying or avoiding medical care during the first wave of the pandemic [30]. Subjects  
6  
7 also decreased their use of formal care but seem to have compensated for it by an increase in  
8  
9 received informal care. This could become a concern should the pandemic persist, since it is  
10  
11 widely acknowledged that informal caregiving places significant economic, physical and  
12  
13 mental burden on caregivers, who are often themselves older adults with health needs [31].  
14  
15

### 16 17 **Strengths and limitations**

18  
19  
20 To the best of our knowledge, this study is the first to examine the consequences of the Swedish  
21  
22 COVID-19 strategy in a random sample of urban older adults. Further strengths include the use  
23  
24 of an *ad hoc* questionnaire developed by a multidisciplinary team of experts, and the study  
25  
26 sample coming from a well-characterized population-based study. Being based on data from  
27  
28 Sweden, the study also provides a unique opportunity for comparison with other settings, as the  
29  
30 Swedish strategy against COVID-19 differed from most countries. Certain limitations also need  
31  
32 to be highlighted. We did not have recent pre-pandemic measures of physical and mental health.  
33  
34 Thus, despite participants being asked to answer the questions for the period since March, the  
35  
36 cross-sectional design does not allow us to assess temporal relationship between the onset of  
37  
38 the pandemic and the studied outcomes. The findings from this cohort of older adults living in  
39  
40 an affluent neighborhood of Stockholm may not be generalizable to the entire Swedish  
41  
42 population. However, these findings could be viewed as a best-case scenario, and the identified  
43  
44 collateral damage would be expected to be of higher magnitude in less urban and affluent parts  
45  
46 of the country.  
47  
48  
49  
50  
51

### 52 53 **Conclusion**

54  
55  
56 The results from this study indicate that, in addition to morbidity and mortality, COVID-19 and  
57  
58 its related restrictions during the first half of 2020 have also resulted in changes that negatively  
59  
60

1  
2  
3 affect the health and lives of the elderly living in Central Stockholm. Furthermore, we found  
4  
5 age-, sex-, living arrangement- and, to a much lesser extent, education-related differences in the  
6  
7 susceptibility to these consequences, with women being at a particularly increased risk. When  
8  
9 introducing restrictions, we emphasize the need of a predefined, evidence-based strategy to  
10  
11 provide support, both during the pandemic and once the outbreak is overcome, to those who are  
12  
13 most susceptible to these consequences.  
14  
15  
16  
17  
18  
19  
20  
21  
22  
23  
24  
25  
26  
27  
28  
29  
30  
31  
32  
33  
34  
35  
36  
37  
38  
39  
40  
41  
42  
43  
44  
45  
46  
47  
48  
49  
50  
51  
52  
53  
54  
55  
56  
57  
58  
59  
60

For peer review only

1  
2  
3 **Contributors:** GB, LF, and AC-L developed the study concept and design. GB performed the  
4 data analysis and drafted the manuscript. GB, FT, GG, LF and AC-L interpreted the data,  
5 provided critical revisions and approved the final version of the manuscript for submission. All  
6 authors agree to be accountable for all aspects of the work and in ensuring that questions related  
7 to the accuracy or integrity of any part of the work are appropriately investigated and resolved.  
8  
9

10  
11  
12  
13  
14  
15  
16  
17 **Funding:** This work was supported by the funders of the Swedish National study on Aging and  
18 Care (SNAC): the Ministry of Health and Social Affairs (grant number N/A), Sweden; the  
19 participating county councils and municipalities; and the Swedish Research Council. A specific  
20 grant was obtained from the Swedish Research Council (2020-05931). Funders had no role in  
21 the in the study design; in the collection, analysis and interpretation of the data; in the writing  
22 of the report; and in the decision to submit the paper for publication.  
23  
24  
25  
26  
27  
28  
29

30  
31  
32  
33 **Competing interests:** None declared.  
34  
35  
36

37 **Patient consent for publication:** Not required.  
38  
39  
40  
41

42 **Provenance and peer review:** Not commissioned; externally peer reviewed.  
43  
44  
45

46  
47 **Data availability statement:** Data are from the SNAC-K project, a population-based study on  
48 aging and dementia (<http://www.snac-k.se/>). Access to these original data is available to the  
49 research community upon approval by the SNAC-K data management and maintenance  
50 committee. Applications for accessing these data can be submitted to Maria Wahlberg  
51 (Maria.Wahlberg@ki.se) at the Aging Research Center, Karolinska Institutet.  
52  
53  
54  
55  
56  
57  
58  
59  
60

## REFERENCES

- 1 Public Health Agency of Sweden. COVID-19 statistics in Sweden. <https://www.folkhalsomyndigheten.se/smittskydd-beredskap/utbrott/aktuella-utbrott/covid-19/statistik-och-analyser/bekraftade-fall-i-sverige/> (accessed 24 Jan 2021).
- 2 Parohan M, Yaghoubi S, Seraji A, *et al.* Risk factors for mortality in patients with Coronavirus disease 2019 (COVID-19) infection: a systematic review and meta-analysis of observational studies. *The Aging Male* 2020;:1–9. doi:10.1080/13685538.2020.1774748
- 3 Tehrani S, Killander A, Åstrand P, *et al.* Risk factors for death in adult COVID-19 patients: Frailty predicts fatal outcome in older patients. *International Journal of Infectious Diseases* 2021;102:415–21. doi:10.1016/j.ijid.2020.10.071
- 4 Hawkins RB, Charles EJ, Mehaffey JH. Socio-economic status and COVID-19–related cases and fatalities. *Public Health* 2020;189:129–34. doi:10.1016/j.puhe.2020.09.016
- 5 Marengoni A, Zucchelli A, Vetrano DL, *et al.* Beyond Chronological Age: Frailty and Multimorbidity Predict In-Hospital Mortality in Patients With Coronavirus Disease 2019. *The Journals of Gerontology: Series A* 2020;:glaa291. doi:10.1093/gerona/glaa291
- 6 Protect yourself and others. [https://www.folkhalsomyndigheten.se/globalassets/smittskydd-sjukdomar/sjukdomar/coronavirus/faktablad-pa-olika-sprak/trafikljus\\_engelska\\_what-to-do-if-you-are.pdf](https://www.folkhalsomyndigheten.se/globalassets/smittskydd-sjukdomar/sjukdomar/coronavirus/faktablad-pa-olika-sprak/trafikljus_engelska_what-to-do-if-you-are.pdf) (accessed 25 Jan 2021).
- 7 Calderón-Larrañaga A, Dekhtyar S, Vetrano DL, *et al.* COVID-19: risk accumulation among biologically and socially vulnerable older populations. *Ageing Research Reviews* 2020;63:101149. doi:10.1016/j.arr.2020.101149
- 8 Courtin E, Knapp M. Social isolation, loneliness and health in old age: a scoping review. *Health Soc Care Community* 2017;25:799–812. doi:10.1111/hsc.12311
- 9 Narici M, De Vito G, Franchi M, *et al.* Impact of sedentarism due to the COVID-19 home confinement on neuromuscular, cardiovascular and metabolic health: Physiological and pathophysiological implications and recommendations for physical and nutritional countermeasures. *European Journal of Sport Science* 2020;:1–22. doi:10.1080/17461391.2020.1761076
- 10 Callow DD, Arnold-Nedimala NA, Jordan LS, *et al.* The Mental Health Benefits of Physical Activity in Older Adults Survive the COVID-19 Pandemic. *The American Journal of Geriatric Psychiatry* 2020;28:1046–57. doi:10.1016/j.jagp.2020.06.024
- 11 Brandén M, Aradhya S, Kolk M, *et al.* Residential context and COVID-19 mortality among adults aged 70 years and older in Stockholm: a population-based, observational study using individual-level data. *The Lancet Healthy Longevity* 2020;1:e80–8. doi:10.1016/S2666-7568(20)30016-7
- 12 Calderón-Larrañaga A, Vetrano DL, Rizzuto D, *et al.* High excess mortality in areas with young and socially vulnerable populations during the COVID-19 outbreak in Stockholm Region, Sweden. *BMJ Glob Health* 2020;5:e003595. doi:10.1136/bmjgh-2020-003595



- 1  
2  
3 13 Drefahl S, Wallace M, Mussino E, *et al.* A population-based cohort study of socio-  
4 demographic risk factors for COVID-19 deaths in Sweden. *Nat Commun* 2020;**11**:5097.  
5 doi:10.1038/s41467-020-18926-3  
6  
7  
8 14 Gustavsson J, Beckman L. Compliance to Recommendations and Mental Health  
9 Consequences among Elderly in Sweden during the Initial Phase of the COVID-19  
10 Pandemic—A Cross Sectional Online Survey. *IJERPH* 2020;**17**:5380.  
11 doi:10.3390/ijerph17155380  
12  
13 15 World Health Organization. Regional Office for Europe. Survey tool and guidance: rapid,  
14 simple, flexible behavioural insights on COVID-19: 29 July 2020. Copenhagen: 2020.  
15 <https://apps.who.int/iris/handle/10665/333549>  
16  
17 16 Hughes ME, Waite LJ, Hawkey LC, *et al.* A Short Scale for Measuring Loneliness in  
18 Large Surveys: Results From Two Population-Based Studies. *Res Aging* 2004;**26**:655–72.  
19 doi:10.1177/0164027504268574  
20  
21 17 Xiong J, Lipsitz O, Nasri F, *et al.* Impact of COVID-19 pandemic on mental health in the  
22 general population: A systematic review. *Journal of Affective Disorders* 2020;**277**:55–64.  
23 doi:10.1016/j.jad.2020.08.001  
24  
25 18 Vindegaard N, Benros ME. COVID-19 pandemic and mental health consequences:  
26 Systematic review of the current evidence. *Brain, Behavior, and Immunity* 2020;**89**:531–  
27 42. doi:10.1016/j.bbi.2020.05.048  
28  
29 19 van der Vegt I, Kleinberg B. Women Worry About Family, Men About the Economy:  
30 Gender Differences in Emotional Responses to COVID-19. In: Aref S, Bontcheva K,  
31 Braghieri M, *et al.*, eds. *Social Informatics*. Cham: : Springer International Publishing  
32 2020. 397–409. doi:10.1007/978-3-030-60975-7\_29  
33  
34 20 Schwarzbach M, Luppá M, Forstmeier S, *et al.* Social relations and depression in late life-  
35 A systematic review: Social relations and depression in late life. *Int J Geriatr Psychiatry*  
36 2014;**29**:1–21. doi:10.1002/gps.3971  
37  
38 21 Jarach CM, Tettamanti M, Nobili A, *et al.* Social isolation and loneliness as related to  
39 progression and reversion of frailty in the Survey of Health Aging Retirement in Europe  
40 (SHARE). *Age and Ageing* 2020;:afaa168. doi:10.1093/ageing/afaa168  
41  
42 22 Evans IEM, Martyr A, Collins R, *et al.* Social Isolation and Cognitive Function in Later  
43 Life: A Systematic Review and Meta-Analysis. *JAD* 2019;**70**:S119–44. doi:10.3233/JAD-  
44 180501  
45  
46 23 Beridze G, Ayala A, Ribeiro O, *et al.* Are Loneliness and Social Isolation Associated with  
47 Quality of Life in Older Adults? Insights from Northern and Southern Europe. *IJERPH*  
48 2020;**17**:8637. doi:10.3390/ijerph17228637  
49  
50 24 Luna E, Ruiz M, Malyutina S, *et al.* The prospective association between frequency of  
51 contact with friends and relatives and quality of life in older adults from Central and  
52 Eastern Europe. *Soc Psychiatry Psychiatr Epidemiol* Published Online First: 10 February  
53 2020. doi:10.1007/s00127-020-01834-8  
54  
55  
56  
57  
58  
59  
60



- 1  
2  
3 25 Hajek A, König H-H. Social Isolation and Loneliness of Older Adults in Times of the  
4 COVID-19 Pandemic: Can Use of Online Social Media Sites and Video Chats Assist in  
5 Mitigating Social Isolation and Loneliness? *Gerontology* 2021;**67**:121–4.  
6 doi:10.1159/000512793  
7
- 8  
9 26 Kahlon MK, Aksan N, Aubrey R, *et al.* Effect of Layperson-Delivered, Empathy-Focused  
10 Program of Telephone Calls on Loneliness, Depression, and Anxiety Among Adults  
11 During the COVID-19 Pandemic: A Randomized Clinical Trial. *JAMA Psychiatry*  
12 Published Online First: 23 February 2021. doi:10.1001/jamapsychiatry.2021.0113  
13
- 14 27 da Silva VD, Tribess S, Meneguci J, *et al.* Association between frailty and the  
15 combination of physical activity level and sedentary behavior in older adults. *BMC Public*  
16 *Health* 2019;**19**:709. doi:10.1186/s12889-019-7062-0  
17
- 18 28 Inoue S, Yorifuji T, Sugiyama M, *et al.* Does Habitual Physical Activity Prevent  
19 Insomnia? A Cross-Sectional and Longitudinal Study of Elderly Japanese. *Journal of*  
20 *Aging and Physical Activity* 2013;**21**:119–39. doi:10.1123/japa.21.2.119  
21
- 22 29 Konsekvenser för personer 70 år och äldre av smittskyddsåtgärder mot covid19.  
23 Folkhälsomyndigheten 2021.  
24
- 25 30 Czeisler MÉ, Marynak K, Clarke KEN, *et al.* Delay or Avoidance of Medical Care  
26 Because of COVID-19–Related Concerns — United States, June 2020. *MMWR Morb*  
27 *Mortal Wkly Rep* 2020;**69**:1250–7. doi:10.15585/mmwr.mm6936a4  
28
- 29 31 Bom J, Bakx P, Schut F, *et al.* The Impact of Informal Caregiving for Older Adults on the  
30 Health of Various Types of Caregivers: A Systematic Review. *The Gerontologist*  
31 Published Online First: 3 November 2018. doi:10.1093/geront/gny137  
32  
33  
34  
35  
36  
37  
38  
39  
40  
41  
42  
43  
44  
45  
46  
47  
48  
49  
50  
51  
52  
53  
54  
55  
56  
57  
58  
59  
60

**Table 1. Study sample characteristics (N=1231).**

|                                                                           |             |
|---------------------------------------------------------------------------|-------------|
| <b>Age mean (SD)</b>                                                      | 78.2 (8.3)  |
| <b>Age n (%)</b>                                                          |             |
| ≤80 years                                                                 | 642 (52.2%) |
| >80 years                                                                 | 589 (47.8%) |
| <b>Female n (%)</b>                                                       | 792 (64.3%) |
| <b>Education n (%)</b>                                                    |             |
| High school, university or above                                          | 809 (65.7%) |
| Elementary school                                                         | 422 (34.3%) |
| <b>Living alone n (%)</b>                                                 | 616 (50.2%) |
| <b>COVID-19-related symptoms n (%)</b>                                    |             |
| 0                                                                         | 801 (65.1%) |
| 1                                                                         | 183 (14.9%) |
| 2+                                                                        | 247 (20.0%) |
| <b>Tested for COVID-19 n (%)</b>                                          |             |
| Yes, positive                                                             | 9 (0.7%)    |
| Yes, negative/unknown                                                     | 53 (4.3%)   |
| <b>Sought medical care n (%)</b>                                          | 595 (48.6%) |
| <b>Found it difficult to access healthcare services<sup>a</sup> n (%)</b> | 79 (14.6%)  |
| <b>Hospitalized due to confirmed or suspected COVID-19 n (%)</b>          | 9 (0.7%)    |

<sup>a</sup> Subsample of those who sought medical care (n=540)

**Table 2. Psychological burden and behavioral changes in the study sample (N=1231) during the first COVID-19 outbreak in Stockholm (March-June 2020).**

| Psychological burden (n, %)                         |              |
|-----------------------------------------------------|--------------|
| <b>Worried about getting COVID-19</b>               |              |
| Not at all, slightly, moderately                    | 1032 (85.4%) |
| Very, extremely                                     | 176 (14.6%)  |
| <b>Worried about loved one getting COVID-19</b>     |              |
| Not at all, slightly, moderately                    | 907 (75.1%)  |
| Very, extremely                                     | 300 (24.9%)  |
| <b>Felt nervous/stressed</b>                        |              |
| Never, sometimes                                    | 1112 (91.9%) |
| Often, very often                                   | 98 (8.1%)    |
| <b>Felt lonely<sup>a</sup></b>                      |              |
| To a low extent (<5)                                | 790 (66.6%)  |
| To a high extent (≥5)                               | 396 (33.4%)  |
| <b>Affected by at least one item</b>                |              |
| 608 (49.8%)                                         |              |
| Reductions in social and physical activities (n, %) |              |
| <b>Social isolation<sup>b</sup></b>                 | 195 (16.3%)  |
| <b>Reduced light physical activity</b>              | 352 (29.4%)  |
| <b>Reduced vigorous physical activity</b>           | 326 (27.3%)  |
| <b>Affected by at least one item</b>                | 676 (55.3%)  |
| Reductions in care use (n, %)                       |              |
| <b>Refrained from seeking medical care</b>          | 126 (10.3%)  |
| <b>Received less home care<sup>c,d</sup></b>        | 16 (8.9%)    |
| <b>Affected by at least one item</b>                | 139 (11.3%)  |
| Sum of collateral damage dimensions (n, %)          |              |
| <b>0</b>                                            | 273 (22.2%)  |
| <b>1</b>                                            | 537 (43.7%)  |
| <b>2</b>                                            | 371 (30.2%)  |
| <b>3</b>                                            | 48 (3.9%)    |

<sup>a</sup> Based on UCLA Three-Item Loneliness Scale (range: 3-9)

<sup>b</sup> Reduction in physical communication without an increase in phone and/or video communication

<sup>c</sup> Reduction in formal care without an increase in informal care

<sup>d</sup> Subsample of those who received home care before the pandemic (n=180)

**Table 3. Association (odds ratios and 95% confidence intervals) between psychological burden and behavioral changes and sociodemographic factors (N=1231) during the first COVID-19 outbreak in Stockholm (March-June 2020). Models mutually adjusted by all sociodemographic factors.**

|                                                   | Oldest vs youngest old | p-value | Female vs male      | p-value | Low vs high education <sup>a</sup> | p-value | Living alone vs not living alone | p-value |
|---------------------------------------------------|------------------------|---------|---------------------|---------|------------------------------------|---------|----------------------------------|---------|
| <b>Psychological burden</b>                       |                        |         |                     |         |                                    |         |                                  |         |
| Worried about getting COVID-19                    | 0.62<br>[0.44,0.87]    | 0.006   | 1.41<br>[0.99,2.03] | 0.060   | 0.90<br>[0.64,1.28]                | 0.575   | 0.91<br>[0.65,1.29]              | 0.597   |
| Worried about loved one getting COVID-19          | 0.84<br>[0.64,1.11]    | 0.215   | 1.54<br>[1.15,2.07] | 0.004   | 0.99<br>[0.75,1.33]                | 0.632   | 0.63<br>[0.47,0.84]              | 0.001   |
| Felt nervous/stressed                             | 0.73<br>[0.47,1.13]    | 0.156   | 2.08<br>[1.23,3.52] | 0.006   | 1.04<br>[0.66,1.62]                | 0.860   | 1.36<br>[0.87,2.16]              | 0.175   |
| Felt lonely <sup>b</sup>                          | 1.08<br>[0.84,1.40]    | 0.551   | 1.61<br>[1.22,2.12] | 0.001   | 0.83<br>[0.64,1.09]                | 0.185   | 1.50<br>[1.15,1.95]              | 0.003   |
| Affected by at least one item                     | 0.94<br>[0.74,1.19]    | 0.597   | 1.90<br>[1.48,2.45] | <0.001  | 0.97<br>[0.75,1.24]                | 0.777   | 1.13<br>[0.89,1.45]              | 0.320   |
| <b>Reductions in social and physical activity</b> |                        |         |                     |         |                                    |         |                                  |         |
| Social isolation <sup>c</sup>                     | 1.19<br>[0.86,1.63]    | 0.295   | 0.64<br>[0.46,0.89] | 0.008   | 1.31<br>[0.95,1.82]                | 0.104   | 1.13<br>[0.81,1.58]              | 0.476   |
| Reduced light physical activity                   | 1.82<br>[1.40,2.37]    | <0.001  | 1.58<br>[1.19,2.11] | 0.002   | 0.94<br>[0.72,1.24]                | 0.680   | 1.06<br>[0.80,1.39]              | 0.692   |
| Reduced vigorous physical activity                | 0.55<br>[0.42,0.72]    | <0.001  | 1.32<br>[0.99,1.76] | 0.056   | 0.79<br>[0.60,1.06]                | 0.116   | 0.76<br>[0.57,1.00]              | 0.05    |
| Affected by at least one item                     | 1.17<br>[0.93,1.49]    | 0.181   | 1.30<br>[1.08,1.78] | 0.009   | 1.05<br>[0.82,1.34]                | 0.691   | 0.89<br>[0.70,1.14]              | 0.373   |
| <b>Reductions in care use</b>                     |                        |         |                     |         |                                    |         |                                  |         |
| Refrained from seeking medical care               | 0.98<br>[0.67,1.44]    | 0.928   | 1.05<br>[0.70,1.58] | 0.801   | 0.94<br>[0.63,1.40]                | 0.761   | 1.10<br>[0.74,1.64]              | 0.637   |
| Received less home care <sup>d,e</sup>            | 0.14<br>[0.03,0.62]    | 0.010   | 3.58<br>[0.63,20.4] | 0.151   | 3.98<br>[1.15,13.7]                | 0.029   | 1.31<br>[0.30,5.63]              | 0.718   |
| Affected by at least one item                     | 1.06<br>[0.73,1.53]    | 0.757   | 1.10<br>[0.74,1.63] | 0.643   | 1.11<br>[0.76,1.62]                | 0.595   | 1.15<br>[0.79,1.69]              | 0.468   |

<sup>a</sup> Low = elementary, high = high school, university or above

<sup>b</sup> Based on UCLA Three-Item Loneliness Scale (range: 3-9)

<sup>c</sup> Defined as reduction in physical communication without an increase in phone and/or video communication

<sup>d</sup> Defined as reduction in formal care without an increase in informal care

<sup>e</sup> Subsample of those who received home care before the pandemic (n=180)

1  
2  
3 **Figure 1. Adherence to preventive recommendations (left) and sources of information (right)**  
4 **related to COVID-19 during the first outbreak in Stockholm (March-June 2020).**  
5  
6  
7  
8  
9  
10  
11  
12  
13  
14

15 **Figure 2. Association (odds ratios and 95% confidence intervals) between number of**  
16 **experienced dimensions of collateral damage and sociodemographic factors (N=1231) during**  
17 **the first COVID-19 outbreak in Stockholm (March-June 2020). Models mutually adjusted by all**  
18 **sociodemographic factors.**  
19  
20  
21  
22  
23  
24  
25  
26  
27  
28  
29  
30  
31  
32  
33  
34  
35  
36  
37  
38  
39  
40  
41  
42  
43  
44  
45  
46  
47  
48  
49  
50  
51  
52  
53  
54  
55  
56  
57  
58  
59  
60

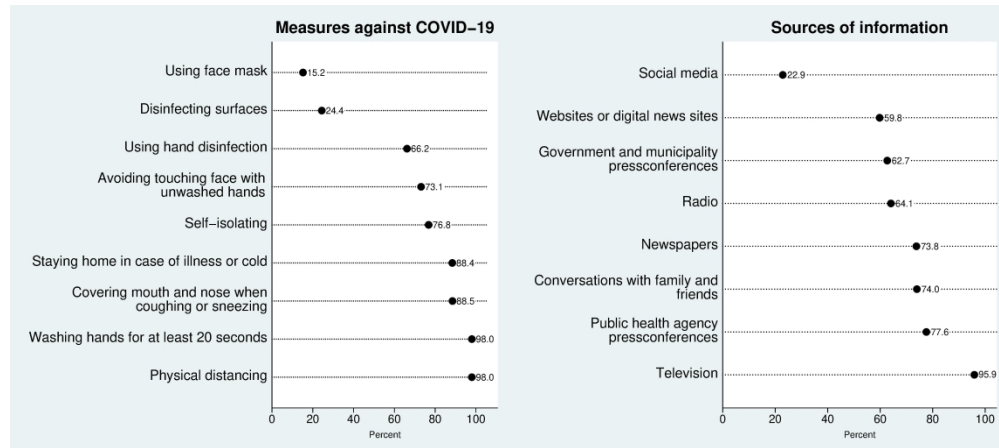

Figure 1. Adherence to preventive recommendations (left) and sources of information (right) related to COVID-19 during the first outbreak in Stockholm (March-June 2020).

228x101mm (600 x 600 DPI)

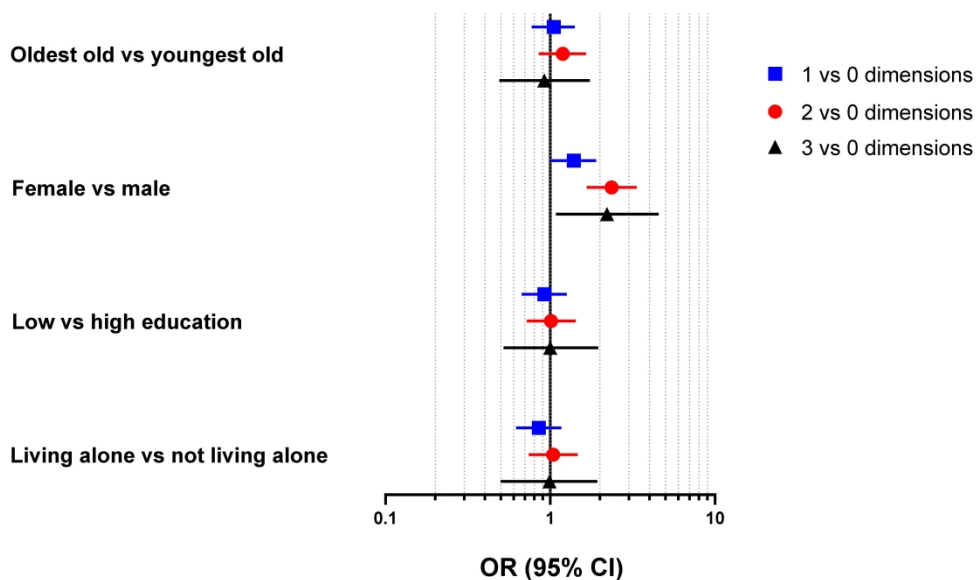

Figure 2. Association (odds ratios and 95% confidence intervals) between number of experienced dimensions of collateral damage and sociodemographic factors (N=1231) during the first COVID-19 outbreak in Stockholm (March-June 2020). Models mutually adjusted by all sociodemographic factors.

220x129mm (600 x 600 DPI)

**Supplementary Table 1. Psychological distress and behavioral changes in the study sample (N=1231) by age and sex during the first COVID-19 outbreak in Stockholm (March-June 2020).**

|                                                     | Age         |             | <i>p</i> -value | Sex         |             | <i>p</i> -value |
|-----------------------------------------------------|-------------|-------------|-----------------|-------------|-------------|-----------------|
|                                                     | Under 80    | Over 80     |                 | Male        | Female      |                 |
|                                                     | n=809       | n=422       |                 | n=439       | n=792       |                 |
| <b>Psychological distress</b>                       |             |             |                 |             |             |                 |
| <b>Worried about getting COVID-19</b>               |             |             | 0.003           |             |             | 0.13            |
| Not at all, slightly, moderately                    | 522 (82.6%) | 510 (88.5%) |                 | 378 (87.5%) | 654 (84.3%) |                 |
| Very, extremely                                     | 110 (17.4%) | 66 (11.5%)  |                 | 54 (12.5%)  | 122 (15.7%) |                 |
| <b>Worried about loved one getting COVID-19</b>     |             |             | 0.054           |             |             | 0.063           |
| Not at all, slightly, moderately                    | 462 (72.9%) | 445 (77.7%) |                 | 338 (78.2%) | 569 (73.4%) |                 |
| Very, extremely                                     | 172 (27.1%) | 128 (22.3%) |                 | 94 (21.8%)  | 206 (26.6%) |                 |
| <b>Felt nervous/stressed</b>                        |             |             | 0.45            |             |             | 0.002           |
| Never, sometimes                                    | 580 (91.3%) | 532 (92.5%) |                 | 410 (95.1%) | 702 (90.1%) |                 |
| Often or very often                                 | 55 (8.7%)   | 43 (7.5%)   |                 | 21 (4.9%)   | 77 (9.9%)   |                 |
| <b>Felt lonely<sup>a</sup></b>                      |             |             | 0.19            |             |             | <0.001          |
| To a low extent (<5)                                | 429 (68.3%) | 361 (64.7%) |                 | 319 (74.7%) | 471 (62.1%) |                 |
| To a high extent (≥5)                               | 199 (31.7%) | 197 (35.3%) |                 | 108 (25.3%) | 288 (37.9%) |                 |
| <b>Affected by at least one item</b>                | 318 (49.7%) | 290 (49.8%) | 0.96            | 171 (39.1%) | 437 (55.7%) | <0.001          |
| <b>Reductions in social and physical activities</b> |             |             |                 |             |             |                 |
| <b>Social isolation<sup>b</sup></b>                 | 94 (14.9%)  | 101 (17.7%) | 0.19            | 97 (22.8%)  | 255 (33.0%) | <0.001          |
| <b>Reduced light physical activity</b>              | 145 (23.2%) | 207 (36.2%) | <0.001          | 110 (26.0%) | 216 (28.1%) | 0.45            |
| <b>Reduced vigorous physical activity</b>           | 209 (33.6%) | 117 (20.5%) | <0.001          | 220 (50.5%) | 456 (58.0%) | 0.011           |
| <b>Affected by at least one item</b>                | 341 (53.3%) | 335 (57.6%) | 0.13            | 83 (19.4%)  | 112 (14.5%) | 0.025           |
| <b>Reductions in care use</b>                       |             |             |                 |             |             |                 |
| <b>Refrained from seeking medical care</b>          | 66 (10.3%)  | 60 (10.3%)  | 0.99            | 43 (9.9%)   | 83 (10.5%)  | 0.71            |
| <b>Received less home care<sup>c,d</sup></b>        | 4 (22.2%)   | 12 (7.4%)   | 0.036           | 2 (4.1%)    | 14 (10.7%)  | 0.17            |
| <b>Affected by at least one item</b>                | 69 (10.8%)  | 70 (11.9%)  | 0.52            | 45 (10.3%)  | 94 (11.9%)  | 0.40            |
| <b>Sum of collateral damage dimensions</b>          |             |             |                 |             |             |                 |
| <b>0</b>                                            | 147 (22.9%) | 126 (21.4%) | 0.40            | 123 (28.1%) | 150 (19.0%) | <0.001          |
| <b>1</b>                                            | 287 (44.8%) | 250 (42.5%) |                 | 207 (47.3%) | 330 (41.7%) |                 |
| <b>2</b>                                            | 180 (28.1%) | 191 (32.5%) |                 | 95 (21.7%)  | 276 (34.9%) |                 |
| <b>3</b>                                            | 27 (4.2%)   | 21 (3.6%)   |                 | 13 (3.0%)   | 35 (4.4%)   |                 |

<sup>a</sup> Based on UCLA Three-Item Loneliness Scale (range: 3-9)

<sup>b</sup> Reduction in physical communication without an increase in phone and/or video communication

<sup>c</sup> Reduction in formal care without an increase in informal care

<sup>d</sup> Subsample of those who received home care before the pandemic (n=180)



**Supplementary Table 2. Psychological distress and behavioral changes in the study sample (N=1231) by education and living arrangement during the first COVID-19 outbreak in Stockholm (March-June 2020).**

|                                                     | Education <sup>a</sup> |             | <i>p</i> -value | Living arrangement |                  | <i>p</i> -value |
|-----------------------------------------------------|------------------------|-------------|-----------------|--------------------|------------------|-----------------|
|                                                     | Low                    | High        |                 | Living alone       | Not living alone |                 |
|                                                     | n=422                  | n=809       |                 | n=612              | n=616            |                 |
| <b>Worried about getting COVID-19</b>               |                        |             | 0.35            |                    |                  | 0.46            |
| Not at all, slightly, moderately                    | 360 (86.7%)            | 672 (84.7%) |                 | 508 (84.7%)        | 523 (86.2%)      |                 |
| Very, extremely                                     | 55 (13.3%)             | 121 (15.3%) |                 | 92 (15.3%)         | 84 (13.8%)       |                 |
| <b>Worried about loved one getting COVID-19</b>     |                        |             | 0.66            |                    |                  | 0.004           |
| Not at all, slightly, moderately                    | 312 (75.9%)            | 595 (74.7%) |                 | 433 (71.6%)        | 473 (78.7%)      |                 |
| Very, extremely                                     | 99 (24.1%)             | 201 (25.3%) |                 | 172 (28.4%)        | 128 (21.3%)      |                 |
| <b>Felt nervous/stressed</b>                        |                        |             | 0.62            |                    |                  | 0.042           |
| Never, sometimes                                    | 381 (91.4%)            | 731 (92.2%) |                 | 566 (93.6%)        | 545 (90.4%)      |                 |
| Often or very often                                 | 36 (8.6%)              | 62 (7.8%)   |                 | 39 (6.4%)          | 58 (9.6%)        |                 |
| <b>Felt lonely<sup>b</sup></b>                      |                        |             | 0.81            |                    |                  | <0.001          |
| To a low extent (<5)                                | 269 (67.1%)            | 521 (66.4%) |                 | 431 (72.4%)        | 358 (60.8%)      |                 |
| To a high extent (≥5)                               | 132 (32.9%)            | 264 (33.6%) |                 | 164 (27.6%)        | 231 (39.2%)      |                 |
| <b>Affected by at least one item</b>                | 213 (50.7%)            | 395 (49.3%) | 0.63            | 280 (46.1%)        | 326 (53.3%)      | 0.012           |
| <b>Reductions in social and physical activities</b> |                        |             |                 |                    |                  |                 |
| <b>Social isolation<sup>c</sup></b>                 | 76 (18.6%)             | 119 (15.0%) | 0.11            | 95 (15.8%)         | 100 (16.7%)      | 0.67            |
| <b>Reduced light physical activity</b>              | 129 (31.2%)            | 223 (28.4%) | 0.31            | 156 (26.2%)        | 196 (32.7%)      | 0.013           |
| <b>Reduced vigorous physical activity</b>           | 94 (22.9%)             | 232 (29.7%) | 0.012           | 183 (31.0%)        | 142 (23.7%)      | 0.005           |
| <b>Affected by at least one item</b>                | 239 (57.0%)            | 437 (54.4%) | 0.38            | 334 (54.9%)        | 341 (55.7%)      | 0.78            |
| <b>Reductions in care use</b>                       |                        |             |                 |                    |                  |                 |
| <b>Refrained from seeking medical care</b>          | 42 (10.1%)             | 84 (10.4%)  | 0.85            | 60 (9.9%)          | 66 (10.8%)       | 0.61            |
| <b>Received less home care<sup>d,e</sup></b>        | 12 (14%)               | 4 (4%)      | 0.025           | 3 (6.7%)           | 13 (9.6%)        | 0.55            |
| <b>Affected by at least one item</b>                | 52 (12.4%)             | 87 (10.8%)  | 0.41            | 63 (10.3%)         | 76 (12.4%)       | 0.27            |
| <b>Sum of collateral damage dimensions</b>          |                        |             |                 |                    |                  |                 |
| <b>0</b>                                            | 92 (21.8%)             | 181 (22.4%) | 0.38            | 141 (23.1%)        | 132 (21.4%)      | 0.046           |
| <b>1</b>                                            | 173 (41.0%)            | 364 (45.1%) |                 | 285 (46.6%)        | 251 (40.7%)      |                 |
| <b>2</b>                                            | 140 (33.2%)            | 231 (28.6%) |                 | 163 (26.7%)        | 207 (33.6%)      |                 |
| <b>3</b>                                            | 17 (4.0%)              | 31 (3.8%)   |                 | 22 (3.6%)          | 26 (4.2%)        |                 |

<sup>a</sup> Low = elementary, high = high school, university or above

<sup>b</sup> Based on UCLA Three-Item Loneliness Scale (range: 3-9)

<sup>c</sup> Reduction in physical communication without an increase in phone and/or video communication

<sup>d</sup> Reduction in formal care without an increase in informal care

<sup>e</sup> Subsample of those who received home care before the pandemic (n=180)

STROBE Statement—Checklist of items that should be included in reports of *cross-sectional studies*

|                              | <b>Item No</b> | <b>Recommendation</b>                                                                                                                                                                             | <b>Page No</b> |
|------------------------------|----------------|---------------------------------------------------------------------------------------------------------------------------------------------------------------------------------------------------|----------------|
| <b>Title and abstract</b>    | 1              | (a) Indicate the study's design with a commonly used term in the title or the abstract                                                                                                            | 2              |
|                              |                | (b) Provide in the abstract an informative and balanced summary of what was done and what was found                                                                                               | 2              |
| <b>Introduction</b>          |                |                                                                                                                                                                                                   |                |
| Background/rationale         | 2              | Explain the scientific background and rationale for the investigation being reported                                                                                                              | 4-5            |
| Objectives                   | 3              | State specific objectives, including any prespecified hypotheses                                                                                                                                  | 5              |
| <b>Methods</b>               |                |                                                                                                                                                                                                   |                |
| Study design                 | 4              | Present key elements of study design early in the paper                                                                                                                                           | 5              |
| Setting                      | 5              | Describe the setting, locations, and relevant dates, including periods of recruitment, exposure, follow-up, and data collection                                                                   | 5-6            |
| Participants                 | 6              | (a) Give the eligibility criteria, and the sources and methods of selection of participants                                                                                                       | 5              |
| Variables                    | 7              | Clearly define all outcomes, exposures, predictors, potential confounders, and effect modifiers. Give diagnostic criteria, if applicable                                                          | 5-7            |
| Data sources/<br>measurement | 8*             | For each variable of interest, give sources of data and details of methods of assessment (measurement). Describe comparability of assessment methods if there is more than one group              | 5-7            |
| Bias                         | 9              | Describe any efforts to address potential sources of bias                                                                                                                                         | NA             |
| Study size                   | 10             | Explain how the study size was arrived at                                                                                                                                                         | 5              |
| Quantitative variables       | 11             | Explain how quantitative variables were handled in the analyses. If applicable, describe which groupings were chosen and why                                                                      | 6              |
| Statistical methods          | 12             | (a) Describe all statistical methods, including those used to control for confounding                                                                                                             | 7              |
|                              |                | (b) Describe any methods used to examine subgroups and interactions                                                                                                                               | NA             |
|                              |                | (c) Explain how missing data were addressed                                                                                                                                                       | 7              |
|                              |                | (d) If applicable, describe analytical methods taking account of sampling strategy                                                                                                                | NA             |
|                              |                | (e) Describe any sensitivity analyses                                                                                                                                                             | NA             |
| <b>Results</b>               |                |                                                                                                                                                                                                   |                |
| Participants                 | 13*            | (a) Report numbers of individuals at each stage of study—eg numbers potentially eligible, examined for eligibility, confirmed eligible, included in the study, completing follow-up, and analysed | 5              |

|                          |     |                                                                                                                                                                                                              |                                                                               |
|--------------------------|-----|--------------------------------------------------------------------------------------------------------------------------------------------------------------------------------------------------------------|-------------------------------------------------------------------------------|
|                          |     | (b) Give reasons for non-participation at each stage                                                                                                                                                         | 5                                                                             |
|                          |     | (c) Consider use of a flow diagram                                                                                                                                                                           | NA                                                                            |
| Descriptive data         | 14* | (a) Give characteristics of study participants (eg demographic, clinical, social) and information on exposures and potential confounders                                                                     | 7-8                                                                           |
|                          |     | (b) Indicate number of participants with missing data for each variable of interest                                                                                                                          | Very high response rates; missingness can be inferred from supplementary data |
| Outcome data             | 15* | Report numbers of outcome events or summary measures                                                                                                                                                         | 8                                                                             |
| Main results             | 16  | (a) Give unadjusted estimates and, if applicable, confounder-adjusted estimates and their precision (eg, 95% confidence interval). Make clear which confounders were adjusted for and why they were included | In all tables and figures.                                                    |
|                          |     | (b) Report category boundaries when continuous variables were categorized                                                                                                                                    | In tables and their footnotes                                                 |
|                          |     | (c) If relevant, consider translating estimates of relative risk into absolute risk for a meaningful time period                                                                                             | NA                                                                            |
| Other analyses           | 17  | Report other analyses done—eg analyses of subgroups and interactions, and sensitivity analyses                                                                                                               | NA                                                                            |
| <b>Discussion</b>        |     |                                                                                                                                                                                                              |                                                                               |
| Key results              | 18  | Summarise key results with reference to study objectives                                                                                                                                                     | 9                                                                             |
| Limitations              | 19  | Discuss limitations of the study, taking into account sources of potential bias or imprecision. Discuss both direction and magnitude of any potential bias                                                   | 11-12                                                                         |
| Interpretation           | 20  | Give a cautious overall interpretation of results considering objectives, limitations, multiplicity of analyses, results from similar studies, and other relevant evidence                                   | 9-11                                                                          |
| Generalisability         | 21  | Discuss the generalisability (external validity) of the study results                                                                                                                                        | 12                                                                            |
| <b>Other information</b> |     |                                                                                                                                                                                                              |                                                                               |
| Funding                  | 22  | Give the source of funding and the role of the funders for the present study and, if applicable, for the original study on which the present article is based                                                | 13                                                                            |

\*Give information separately for exposed and unexposed groups.

**Note:** An Explanation and Elaboration article discusses each checklist item and gives methodological background and published examples of transparent reporting. The STROBE checklist is best used in conjunction with this article (freely available on the Web sites of PLoS Medicine at <http://www.plosmedicine.org/>, Annals of Internal Medicine at <http://www.annals.org/>, and Epidemiology at <http://www.epidem.com/>). Information on the STROBE Initiative is available at [www.strobe-statement.org](http://www.strobe-statement.org).
