# Supplementary material for: COVID-19 collateral damage—psychological burden and behavioural changes among older adults during the first outbreak in Stockholm, Sweden: a cross-sectional study
Source: PubMed Central journal article supplement (PMC8743841; doi:10.1136/bmjopen-2021-058422), 2022-01-07
Supplement: bmjopen-2021-058422supp001.pdf [file bmjopen-2021-058422supp001.pdf]

**Supplementary Table 1. Psychological burden and behavioral changes in the study sample (N=1231) by age and sex during the first COVID-19 outbreak in Stockholm (March-June 2020).**

|                                                     | Age               |                  | <i>p</i> -value | Sex           |                 | <i>p</i> -value |
|-----------------------------------------------------|-------------------|------------------|-----------------|---------------|-----------------|-----------------|
|                                                     | Under 80<br>n=809 | Over 80<br>n=422 |                 | Male<br>n=439 | Female<br>n=792 |                 |
| <b>Psychological burden</b>                         |                   |                  |                 |               |                 |                 |
| <b>Worried about getting COVID-19</b>               |                   |                  | 0.003           |               |                 | 0.13            |
| Not at all, slightly, moderately                    | 522 (82.6%)       | 510 (88.5%)      |                 | 378 (87.5%)   | 654 (84.3%)     |                 |
| Very, extremely                                     | 110 (17.4%)       | 66 (11.5%)       |                 | 54 (12.5%)    | 122 (15.7%)     |                 |
| <b>Worried about loved one getting COVID-19</b>     |                   |                  | 0.054           |               |                 | 0.063           |
| Not at all, slightly, moderately                    | 462 (72.9%)       | 445 (77.7%)      |                 | 338 (78.2%)   | 569 (73.4%)     |                 |
| Very, extremely                                     | 172 (27.1%)       | 128 (22.3%)      |                 | 94 (21.8%)    | 206 (26.6%)     |                 |
| <b>Felt nervous/stressed</b>                        |                   |                  | 0.45            |               |                 | 0.002           |
| Never, sometimes                                    | 580 (91.3%)       | 532 (92.5%)      |                 | 410 (95.1%)   | 702 (90.1%)     |                 |
| Often or very often                                 | 55 (8.7%)         | 43 (7.5%)        |                 | 21 (4.9%)     | 77 (9.9%)       |                 |
| <b>Felt lonely<sup>a</sup></b>                      |                   |                  | 0.19            |               |                 | <0.001          |
| To a low extent (<5)                                | 429 (68.3%)       | 361 (64.7%)      |                 | 319 (74.7%)   | 471 (62.1%)     |                 |
| To a high extent (≥5)                               | 199 (31.7%)       | 197 (35.3%)      |                 | 108 (25.3%)   | 288 (37.9%)     |                 |
| <b>Affected by at least one item</b>                | 318 (49.7%)       | 290 (49.8%)      | 0.96            | 171 (39.1%)   | 437 (55.7%)     | <0.001          |
| <b>Reductions in social and physical activities</b> |                   |                  |                 |               |                 |                 |
| <b>Social isolation<sup>b</sup></b>                 | 94 (14.9%)        | 101 (17.7%)      | 0.19            | 97 (22.8%)    | 255 (33.0%)     | <0.001          |
| <b>Reduced light physical activity</b>              | 145 (23.2%)       | 207 (36.2%)      | <0.001          | 110 (26.0%)   | 216 (28.1%)     | 0.45            |
| <b>Reduced vigorous physical activity</b>           | 209 (33.6%)       | 117 (20.5%)      | <0.001          | 220 (50.5%)   | 456 (58.0%)     | 0.011           |
| <b>Affected by at least one item</b>                | 341 (53.3%)       | 335 (57.6%)      | 0.13            | 83 (19.4%)    | 112 (14.5%)     | 0.025           |
| <b>Reductions in care use</b>                       |                   |                  |                 |               |                 |                 |
| <b>Refrained from seeking medical care</b>          | 66 (10.3%)        | 60 (10.3%)       | 0.99            | 43 (9.9%)     | 83 (10.5%)      | 0.71            |
| <b>Received less home care<sup>c,d</sup></b>        | 4 (22.2%)         | 12 (7.4%)        | 0.036           | 2 (4.1%)      | 14 (10.7%)      | 0.17            |
| <b>Affected by at least one item</b>                | 69 (10.8%)        | 70 (11.9%)       | 0.52            | 45 (10.3%)    | 94 (11.9%)      | 0.40            |
| <b>Sum of collateral damage dimensions</b>          |                   |                  |                 |               |                 |                 |
| <b>0</b>                                            | 147 (22.9%)       | 126 (21.4%)      | 0.40            | 123 (28.1%)   | 150 (19.0%)     | <0.001          |
| <b>1</b>                                            | 287 (44.8%)       | 250 (42.5%)      |                 | 207 (47.3%)   | 330 (41.7%)     |                 |
| <b>2</b>                                            | 180 (28.1%)       | 191 (32.5%)      |                 | 95 (21.7%)    | 276 (34.9%)     |                 |
| <b>3</b>                                            | 27 (4.2%)         | 21 (3.6%)        |                 | 13 (3.0%)     | 35 (4.4%)       |                 |

<sup>a</sup> Based on the Three-Item Loneliness Scale (range: 3-9)

<sup>b</sup> Reduction in physical communication without an increase in phone and/or video communication

<sup>c</sup> Reduction in formal care without an increase in informal care

<sup>d</sup> Subsample of those who received home care before the pandemic (n=180)

**Supplementary Table 2. Psychological burden and behavioral changes in the study sample (N=1231) by education and living arrangement during the first COVID-19 outbreak in Stockholm (March-June 2020).**

|                                                     | Education <sup>a</sup> |               | <i>p</i> -value | Living arrangement    |                           | <i>p</i> -value |
|-----------------------------------------------------|------------------------|---------------|-----------------|-----------------------|---------------------------|-----------------|
|                                                     | Low<br>n=422           | High<br>n=809 |                 | Living alone<br>n=612 | Not living alone<br>n=616 |                 |
| <b>Psychological burden</b>                         |                        |               |                 |                       |                           |                 |
| <b>Worried about getting COVID-19</b>               |                        |               | 0.35            |                       |                           | 0.46            |
| Not at all, slightly, moderately                    | 360 (86.7%)            | 672 (84.7%)   |                 | 508 (84.7%)           | 523 (86.2%)               |                 |
| Very, extremely                                     | 55 (13.3%)             | 121 (15.3%)   |                 | 92 (15.3%)            | 84 (13.8%)                |                 |
| <b>Worried about loved one getting COVID-19</b>     |                        |               | 0.66            |                       |                           | 0.004           |
| Not at all, slightly, moderately                    | 312 (75.9%)            | 595 (74.7%)   |                 | 433 (71.6%)           | 473 (78.7%)               |                 |
| Very, extremely                                     | 99 (24.1%)             | 201 (25.3%)   |                 | 172 (28.4%)           | 128 (21.3%)               |                 |
| <b>Felt nervous/stressed</b>                        |                        |               | 0.62            |                       |                           | 0.042           |
| Never, sometimes                                    | 381 (91.4%)            | 731 (92.2%)   |                 | 566 (93.6%)           | 545 (90.4%)               |                 |
| Often or very often                                 | 36 (8.6%)              | 62 (7.8%)     |                 | 39 (6.4%)             | 58 (9.6%)                 |                 |
| <b>Felt lonely<sup>b</sup></b>                      |                        |               | 0.81            |                       |                           | <0.001          |
| To a low extent (<5)                                | 269 (67.1%)            | 521 (66.4%)   |                 | 431 (72.4%)           | 358 (60.8%)               |                 |
| To a high extent (≥5)                               | 132 (32.9%)            | 264 (33.6%)   |                 | 164 (27.6%)           | 231 (39.2%)               |                 |
| <b>Affected by at least one item</b>                | 213 (50.7%)            | 395 (49.3%)   | 0.63            | 280 (46.1%)           | 326 (53.3%)               | 0.012           |
| <b>Reductions in social and physical activities</b> |                        |               |                 |                       |                           |                 |
| <b>Social isolation<sup>c</sup></b>                 | 76 (18.6%)             | 119 (15.0%)   | 0.11            | 95 (15.8%)            | 100 (16.7%)               | 0.67            |
| <b>Reduced light physical activity</b>              | 129 (31.2%)            | 223 (28.4%)   | 0.31            | 156 (26.2%)           | 196 (32.7%)               | 0.013           |
| <b>Reduced vigorous physical activity</b>           | 94 (22.9%)             | 232 (29.7%)   | 0.012           | 183 (31.0%)           | 142 (23.7%)               | 0.005           |
| <b>Affected by at least one item</b>                | 239 (57.0%)            | 437 (54.4%)   | 0.38            | 334 (54.9%)           | 341 (55.7%)               | 0.78            |
| <b>Reductions in care use</b>                       |                        |               |                 |                       |                           |                 |
| <b>Refrained from seeking medical care</b>          | 42 (10.1%)             | 84 (10.4%)    | 0.85            | 60 (9.9%)             | 66 (10.8%)                | 0.61            |
| <b>Received less home care<sup>d,e</sup></b>        | 12 (14%)               | 4 (4%)        | 0.025           | 3 (6.7%)              | 13 (9.6%)                 | 0.55            |
| <b>Affected by at least one item</b>                | 52 (12.4%)             | 87 (10.8%)    | 0.41            | 63 (10.3%)            | 76 (12.4%)                | 0.27            |
| <b>Sum of collateral damage dimensions</b>          |                        |               |                 |                       |                           |                 |
| <b>0</b>                                            | 92 (21.8%)             | 181 (22.4%)   | 0.38            | 141 (23.1%)           | 132 (21.4%)               | 0.046           |
| <b>1</b>                                            | 173 (41.0%)            | 364 (45.1%)   |                 | 285 (46.6%)           | 251 (40.7%)               |                 |
| <b>2</b>                                            | 140 (33.2%)            | 231 (28.6%)   |                 | 163 (26.7%)           | 207 (33.6%)               |                 |
| <b>3</b>                                            | 17 (4.0%)              | 31 (3.8%)     |                 | 22 (3.6%)             | 26 (4.2%)                 |                 |

<sup>a</sup> Low = elementary, high = high school, university or above<sup>b</sup> Based on the Three-Item Loneliness Scale (range: 3-9)<sup>c</sup> Reduction in physical communication without an increase in phone and/or video communication<sup>d</sup> Reduction in formal care without an increase in informal care<sup>e</sup> Subsample of those who received home care before the pandemic (n=180)
